# Supplementary material for: Global burden of amputation among children and adolescents from 1990 to 2021: systematic analysis of the Global Burden of Disease study 2021
Source: Front Public Health. 2025 Jun 27;13:1589309. doi: 10.3389/fpubh.2025.1589309 (PMC12277607; doi:10.3389/fpubh.2025.1589309)
Supplement: SUPPLEMENTARY TABLE S3 — The YLDs of amputation among children and adolescents in 1990 and 2021 and the annual percentage change by region.. [file Table_3.xlsx]

## Sheet: Incidence
location	YLDs
	Num_1990 (95% UI)	Num_2021 (95% UI)	ASR_1990 per 100,000 (95% UI)	ASR_2021 per 100,000 (95% UI)	AAPC (95% CI)	P value
Global	694981.149(1064645.859 to 465938.078)	497803.498(782011.882 to 320073.251)	30.706(47.042 to 20.584)	18.3(28.754 to 11.767)	-1.683_x000D_ (-1.84 to -1.525)	<0.001
Sex
Male	413309.892(637494.042 to 272592.33)	295282.119(474194.649 to 187327.645)	35.73(55.121 to 23.559)	21.07(33.843 to 13.367)	-1.65_x000D_ (-1.825 to -1.475)	<0.001
Female	281671.258(429532.42 to 191958.531)	202521.379(313717.696 to 133057.076)	25.479(38.862 to 17.362)	15.366(23.808 to 10.094)	-1.697_x000D_ (-1.812 to -1.582)	<0.001
SDI
High SDI	65179.979(115456.538 to 36493.108)	40135.794(74005.801 to 20662.945)	24.523(43.476 to 13.725)	16.131(29.752 to 8.305)	-1.356_x000D_ (-1.427 to -1.285)	<0.001
High-middle SDI	122397.229(197358.879 to 77585.708)	55078.555(98402.816 to 30318.058)	31.463(50.807 to 19.953)	17.338(30.972 to 9.549)	-1.907_x000D_ (-2.002 to -1.812)	<0.001
Middle SDI	229283.212(343030.499 to 156836.877)	133321.612(214756.529 to 81681.255)	29.241(43.769 to 19.991)	16.921(27.269 to 10.369)	-1.75_x000D_ (-1.849 to -1.652)	<0.001
Low-middle SDI	167036.944(248703.989 to 115108.519)	129038.965(197654.268 to 86061.168)	29.523(43.986 to 20.348)	16.27(24.934 to 10.847)	-1.894_x000D_ (-2.143 to -1.645)	<0.001
Low SDI	110288.251(193148.026 to 67231.808)	139609.496(204731.845 to 93140.008)	43.611(76.756 to 26.461)	24.43(35.835 to 16.298)	-1.88_x000D_ (-2.144 to -1.616)	<0.001
GBD regions
Andean Latin America	7699.574(11932.211 to 5041.757)	4556.104(7668.732 to 2697.029)	41.138(63.789 to 26.943)	18.818(31.688 to 11.135)	-2.521_x000D_ (-2.658 to -2.383)	<0.001
Australasia	3177.331(5937.486 to 1565.476)	3330.989(6371.48 to 1603.877)	47.378(88.704 to 23.28)	42.216(80.782 to 20.319)	-0.372_x000D_ (-0.414 to -0.33)	<0.001
Caribbean	4420.472(6892.018 to 2840.999)	7424.749(12066.223 to 4649.448)	28.777(44.853 to 18.5)	46.679(75.881 to 29.22)	1.587_x000D_ (1.106 to 2.069)	<0.001
Central Asia	12844.919(20411.056 to 8185.05)	8960.947(14821.489 to 5404.698)	42.407(67.389 to 27.01)	27.144(44.871 to 16.389)	-1.344_x000D_ (-1.623 to -1.065)	<0.001
Central Europe	26510.824(44709.893 to 15855.088)	9867.63(18286.887 to 5060.994)	63.31(106.777 to 37.869)	39.319(72.894 to 20.164)	-1.527_x000D_ (-1.685 to -1.369)	<0.001
Central Latin America	52642.876(79094.116 to 34895.826)	27427.723(46062.513 to 16432.346)	64.181(96.435 to 42.54)	30.234(50.799 to 18.102)	-2.381_x000D_ (-2.591 to -2.17)	<0.001
Central Sub-Saharan Africa	9495.181(14025.788 to 6082.939)	13032.768(19072.686 to 8528.357)	33.92(50.138 to 21.723)	18.377(26.876 to 12.037)	-1.896_x000D_ (-2.55 to -1.239)	<0.001
East Asia	109126.59(163998.541 to 74676.164)	36159.249(64234.446 to 20218.91)	22.487(33.808 to 15.357)	10.216(18.136 to 5.717)	-2.518_x000D_ (-2.735 to -2.3)	<0.001
Eastern Europe	35415.297(59989.399 to 21209.613)	12581.35(22646.314 to 6857.544)	51.415(87.085 to 30.802)	25.91(46.606 to 14.132)	-2.188_x000D_ (-2.241 to -2.136)	<0.001
Eastern Sub-Saharan Africa	49728.74(79443.699 to 31023.213)	41473.581(60598.218 to 28154.822)	49.56(79.402 to 30.866)	18.488(27.008 to 12.55)	-3.07_x000D_ (-3.476 to -2.663)	<0.001
High-income Asia Pacific	13214.176(23599.981 to 7342.511)	5360.887(9913.593 to 2761.011)	23.289(41.648 to 12.948)	15.845(29.349 to 8.155)	-1.226_x000D_ (-1.297 to -1.155)	<0.001
High-income North America	14288.725(26433.331 to 7469.105)	9078.79(16526.411 to 4620.866)	16.997(31.453 to 8.881)	9.352(17.04 to 4.763)	-2_x000D_ (-2.209 to -1.79)	<0.001
North Africa and Middle East	85669.636(151414.827 to 51126.16)	81799.379(129683.752 to 49022.719)	50.389(89.151 to 30.034)	34.213(54.237 to 20.508)	-1.159_x000D_ (-1.498 to -0.819)	<0.001
Oceania	474.396(708.046 to 313.391)	886.767(1329.226 to 569.479)	14.646(21.861 to 9.678)	14.514(21.751 to 9.309)	-0.244_x000D_ (-0.999 to 0.517)	0.529
South Asia	125625.996(185054.712 to 87462.668)	104145.9(160305.097 to 70297.45)	24.073(35.447 to 16.765)	14.212(21.894 to 9.58)	-1.675_x000D_ (-1.81 to -1.54)	<0.001
Southeast Asia	60474.834(97424.482 to 39316.623)	38615.966(59715.27 to 25517.649)	27.363(44.081 to 17.79)	16.064(24.858 to 10.609)	-1.678_x000D_ (-1.992 to -1.362)	<0.001
Southern Latin America	6593.578(11664.214 to 3708.995)	5968.128(10983.282 to 3144.15)	33.622(59.472 to 18.912)	28.371(52.227 to 14.941)	-0.553_x000D_ (-0.61 to -0.496)	<0.001
Southern Sub-Saharan Africa	6419.497(10229.617 to 4184.156)	4279.409(6435.269 to 2813.547)	24.609(39.206 to 16.04)	13.446(20.225 to 8.843)	-1.933_x000D_ (-2.016 to -1.85)	<0.001
Tropical Latin America	23759.325(36723.574 to 15482.076)	16064.226(26075.84 to 9669.648)	33.531(51.802 to 21.861)	23.21(37.703 to 13.96)	-1.168_x000D_ (-1.299 to -1.037)	<0.001
Western Europe	24767.432(45482.03 to 13130.413)	19408.307(36245.645 to 9980.213)	23.219(42.629 to 12.31)	19.831(37.043 to 10.205)	-0.507_x000D_ (-0.54 to -0.474)	<0.001
Western Sub-Saharan Africa	22631.751(32907.236 to 15724.107)	47380.651(69888.281 to 32187.196)	22.891(33.214 to 15.915)	18.422(27.145 to 12.522)	-0.716_x000D_ (-0.904 to -0.527)	<0.001
Country
Afghanistan	21438.799(73768.947 to 4600.909)	20548.546(35292.429 to 11382.915)	396.031(1365.596 to 84.61)	123.537(212.344 to 68.425)	-3.687_x000D_ (-4.182 to -3.191)	0
Albania	1093.831(1853.158 to 646.086)	322.255(599.933 to 165.138)	75.979(128.697 to 44.867)	47.31(88.057 to 24.207)	-1.59_x000D_ (-1.857 to -1.321)	0
Algeria	3894.536(6012.099 to 2463.547)	2377.008(3988.509 to 1374.326)	29.56(45.589 to 18.72)	15.26(25.589 to 8.851)	-2.118_x000D_ (-2.328 to -1.909)	0
American Samoa	2.849(4.46 to 1.769)	3.367(5.41 to 2.043)	12.647(19.8 to 7.841)	15.556(24.987 to 9.463)	0.729_x000D_ (0.042 to 1.42)	0.037
Andorra	3.383(6.382 to 1.724)	3.321(6.137 to 1.654)	22.251(41.926 to 11.322)	19.944(36.898 to 9.948)	-0.361_x000D_ (-0.416 to -0.306)	0
Angola	4527.747(7442.378 to 2631.58)	2536.396(3931.275 to 1564.694)	88.878(146.384 to 51.69)	14.513(22.47 to 8.956)	-5.51_x000D_ (-6.771 to -4.233)	0
Antigua and Barbuda	6.615(11.051 to 3.973)	6.776(11.966 to 3.86)	26.907(44.923 to 16.167)	26.336(46.497 to 14.982)	-0.085_x000D_ (-0.245 to 0.076)	0.3
Argentina	4613.92(8137.693 to 2549.381)	4054.836(7329.217 to 2157.481)	35.19(62.086 to 19.446)	27.392(49.525 to 14.571)	-0.814_x000D_ (-0.891 to -0.737)	0
Armenia	1191.336(1989.342 to 718.096)	386.094(646.238 to 218.629)	90.867(151.469 to 54.904)	49.718(83.188 to 28.171)	-1.808_x000D_ (-2.154 to -1.46)	0
Australia	2577.309(4817.831 to 1250.513)	2655.054(5107.361 to 1284.53)	46.649(87.375 to 22.578)	40.739(78.387 to 19.705)	-0.433_x000D_ (-0.472 to -0.394)	0
Austria	549.228(1022.803 to 283.673)	413.491(775.559 to 212.285)	27.239(50.731 to 14.068)	22.376(41.927 to 11.472)	-0.635_x000D_ (-0.734 to -0.536)	0
Azerbaijan	1116.632(1766.636 to 689.757)	1041.139(1722.414 to 627.381)	36.277(57.398 to 22.403)	33.287(55.061 to 20.068)	-0.089_x000D_ (-0.557 to 0.382)	0.711
Bahamas	26.359(42.091 to 16.295)	31.547(52.882 to 19.099)	23.238(37.074 to 14.361)	24.582(41.254 to 14.795)	0.293_x000D_ (0.042 to 0.545)	0.022
Bahrain	40.243(63.251 to 24.386)	57.407(102.292 to 30.32)	21.618(34.003 to 13.139)	13.207(23.574 to 6.968)	-1.617_x000D_ (-1.878 to -1.354)	0
Bangladesh	11345.939(17069.44 to 7280.336)	7922.049(12518.401 to 4805.994)	19.868(29.882 to 12.756)	12.237(19.342 to 7.43)	-1.565_x000D_ (-1.972 to -1.156)	0
Barbados	21.064(34.561 to 12.419)	14.869(25.573 to 8.245)	23.043(37.866 to 13.577)	19.841(34.163 to 11.003)	-0.478_x000D_ (-0.601 to -0.356)	0
Belarus	1379.88(2335.238 to 821.856)	567.09(1050.349 to 290.403)	43.083(72.916 to 25.651)	27.306(50.509 to 13.998)	-1.459_x000D_ (-1.536 to -1.382)	0
Belgium	654.688(1231.26 to 332.541)	579.777(1087.48 to 295.946)	24.76(46.568 to 12.568)	21.489(40.301 to 10.962)	-0.443_x000D_ (-0.684 to -0.201)	0
Belize	29.178(45.917 to 18.367)	42.309(68.968 to 25.717)	29.514(46.447 to 18.578)	22.709(37.046 to 13.765)	-0.864_x000D_ (-1.158 to -0.569)	0
Benin	581.6(875.178 to 363.861)	1241.901(1918.16 to 775.918)	22.732(34.126 to 14.275)	17.556(27.092 to 10.992)	-0.819_x000D_ (-0.883 to -0.754)	0
Bermuda	3.587(6.087 to 2.081)	2.36(4.392 to 1.176)	21.979(37.321 to 12.728)	18.78(34.938 to 9.357)	-0.512_x000D_ (-0.572 to -0.451)	0
Bhutan	67.755(103.635 to 42.803)	44.922(72.37 to 26.696)	19.898(30.454 to 12.555)	16.505(26.668 to 9.801)	-0.598_x000D_ (-0.872 to -0.322)	0
Bolivia (Plurinational State of)	1051.703(1605.486 to 673.073)	941.935(1513.347 to 585.867)	32.954(50.291 to 21.128)	20.366(32.719 to 12.659)	-1.551_x000D_ (-1.637 to -1.464)	0
Bosnia and Herzegovina	1211.975(2053.913 to 713.874)	303.673(563.604 to 158.518)	76.765(129.973 to 45.256)	42.045(78.01 to 21.912)	-1.806_x000D_ (-2.408 to -1.201)	0
Botswana	120.374(182.416 to 76.321)	145.58(227.617 to 87.325)	16.8(25.427 to 10.642)	15.461(24.183 to 9.272)	-0.274_x000D_ (-0.354 to -0.193)	0
Brazil	23214.862(35882.496 to 15126.02)	15539.616(25232.094 to 9357.116)	33.689(52.047 to 21.962)	23.407(38.039 to 14.083)	-1.154_x000D_ (-1.292 to -1.016)	0
Brunei Darussalam	25.358(42.385 to 14.758)	26.069(45.712 to 14.199)	22.872(38.238 to 13.31)	18.946(33.206 to 10.318)	-0.606_x000D_ (-0.679 to -0.532)	0
Bulgaria	1716.254(2941.177 to 1006.415)	652.086(1182.396 to 354.421)	66.585(114.259 to 39.012)	47.42(86.027 to 25.765)	-1.089_x000D_ (-1.131 to -1.048)	0
Burkina Faso	1157.907(1732.044 to 739.396)	2732.425(4104.259 to 1731.596)	22.373(33.456 to 14.286)	22.871(34.347 to 14.505)	0.108_x000D_ (-0.049 to 0.265)	0.178
Burundi	612.183(916.047 to 395.298)	1531.191(2303.225 to 948.488)	21.689(32.427 to 14.029)	22.363(33.655 to 13.864)	-0.217_x000D_ (-1.5 to 1.082)	0.742
Cabo Verde	37.985(59.727 to 22.951)	28.316(46.387 to 16.57)	20.574(32.288 to 12.453)	13.816(22.659 to 8.093)	-1.275_x000D_ (-1.366 to -1.184)	0
Cambodia	4500.594(11485.316 to 1661.561)	888.437(1392.429 to 549.882)	89.243(228.73 to 32.671)	13.225(20.731 to 8.189)	-5.92_x000D_ (-6.109 to -5.731)	0
Cameroon	1089.755(1670.858 to 685.229)	3201.032(4907.638 to 2000.878)	19.991(30.55 to 12.614)	19.61(30.043 to 12.263)	-0.034_x000D_ (-0.156 to 0.089)	0.587
Canada	977.638(1814.101 to 502.778)	828.183(1543.29 to 413.062)	12.192(22.611 to 6.274)	9.454(17.627 to 4.72)	-0.823_x000D_ (-0.892 to -0.754)	0
Central African Republic	299.513(441.184 to 191.667)	1201.103(1874.496 to 741.87)	21.858(32.189 to 13.986)	42.786(66.816 to 26.43)	2.198_x000D_ (1.492 to 2.91)	0
Chad	1597.838(2585.084 to 960.942)	2199.586(3281.492 to 1370.347)	52.568(85.193 to 31.635)	22.289(33.195 to 13.887)	-2.736_x000D_ (-3.356 to -2.111)	0
Chile	1592.985(2758.732 to 900.224)	1658.063(3144.69 to 835.958)	29.638(51.35 to 16.735)	31.61(59.982 to 15.92)	0.207_x000D_ (0.085 to 0.33)	0.001
China	107185.82(161062.085 to 73417.664)	35339.072(62825.171 to 19705.552)	22.819(34.308 to 15.598)	10.32(18.334 to 5.76)	-2.532_x000D_ (-2.762 to -2.302)	0
Colombia	9299.388(14450.145 to 5929.793)	4633.663(8113.125 to 2664.505)	62.132(96.562 to 39.605)	29.604(51.949 to 16.972)	-2.395_x000D_ (-2.543 to -2.246)	0
Comoros	54.918(81.574 to 36.092)	59.945(93.239 to 37.296)	21.963(32.611 to 14.433)	18.683(29.07 to 11.612)	-0.399_x000D_ (-0.965 to 0.171)	0.17
Congo	238.419(365.581 to 148.379)	328.556(508.31 to 198.533)	18.595(28.488 to 11.574)	13.008(20.125 to 7.869)	-2.047_x000D_ (-4.955 to 0.95)	0.179
Cook Islands	1.264(2.014 to 0.757)	0.492(0.847 to 0.273)	14.468(23.07 to 8.655)	8.621(14.878 to 4.801)	-1.654_x000D_ (-2.143 to -1.163)	0
Costa Rica	511.342(852.444 to 307.234)	418.871(750.239 to 226.769)	37.081(61.785 to 22.304)	28.584(51.187 to 15.442)	-0.843_x000D_ (-0.919 to -0.767)	0
Coted'Ivoire	1254.379(1913.698 to 803.715)	2340.68(3613.237 to 1443.782)	19.898(30.296 to 12.732)	17.172(26.482 to 10.607)	-0.471_x000D_ (-0.67 to -0.271)	0
Croatia	768.811(1372.403 to 420.852)	326.092(611.03 to 162.842)	53.896(96.147 to 29.492)	37.331(70.046 to 18.626)	-1.165_x000D_ (-1.437 to -0.892)	0
Cuba	1018.072(1697.841 to 602.211)	613.649(1092.513 to 325.93)	25.002(41.843 to 14.696)	23.784(42.374 to 12.639)	-0.168_x000D_ (-0.252 to -0.085)	0
Cyprus	63.402(112.836 to 33.993)	58.42(109.977 to 30.11)	23.745(42.254 to 12.735)	20.158(37.949 to 10.389)	-0.533_x000D_ (-0.623 to -0.443)	0
Czechia	2406.109(4205.286 to 1374.272)	1045.607(1949.496 to 520.752)	70.678(123.549 to 40.259)	45.871(85.481 to 22.857)	-1.377_x000D_ (-1.601 to -1.152)	0
Democratic People's Republic of Korea	1081.232(1666.127 to 693.239)	553.281(871.425 to 344.053)	14.021(21.62 to 8.974)	7.74(12.183 to 4.832)	-1.91_x000D_ (-2.008 to -1.811)	0
Democratic Republic of the Congo	4288.53(6447.049 to 2710.558)	8761.773(13237.777 to 5459.187)	21.608(32.419 to 13.668)	18.821(28.431 to 11.737)	-0.39_x000D_ (-1.07 to 0.296)	0.264
Denmark	303.448(558.227 to 159.119)	286.154(538.723 to 140.517)	21.883(40.146 to 11.482)	20.69(38.962 to 10.147)	-0.161_x000D_ (-0.199 to -0.122)	0
Djibouti	48.578(72.63 to 31.323)	86.844(136.432 to 53.768)	21.892(32.742 to 14.104)	16.574(26.04 to 10.266)	-0.925_x000D_ (-1.555 to -0.291)	0.004
Dominica	7.517(11.806 to 4.669)	5.823(9.368 to 3.494)	22.313(35.085 to 13.832)	26.771(43.115 to 16.04)	0.6_x000D_ (0.46 to 0.74)	0
Dominican Republic	873.567(1341.839 to 555.713)	841.906(1365.958 to 497.309)	25.003(38.422 to 15.892)	21.05(34.18 to 12.42)	-0.577_x000D_ (-0.661 to -0.492)	0
Ecuador	1670.871(2609.424 to 1047.747)	1356.596(2250.682 to 804.923)	33.783(52.751 to 21.192)	19.908(33.039 to 11.811)	-1.697_x000D_ (-1.879 to -1.515)	0
Egypt	8550.626(12754.136 to 5510.711)	7346.188(11702.456 to 4400.672)	31.938(47.62 to 20.601)	16.247(25.873 to 9.732)	-2.157_x000D_ (-2.23 to -2.083)	0
El Salvador	4719.467(8054.772 to 2698.596)	736.764(1243.397 to 431.735)	173.574(296.238 to 99.238)	30.117(50.85 to 17.637)	-5.492_x000D_ (-5.858 to -5.125)	0
Equatorial Guinea	47.989(70.988 to 31.18)	94.89(152.99 to 58.791)	22.029(32.56 to 14.307)	11.844(19.103 to 7.338)	-2.012_x000D_ (-2.118 to -1.905)	0
Eritrea	6761.554(12382.565 to 3522.739)	534.764(804.065 to 335.165)	378.757(693.847 to 197.521)	16.963(25.497 to 10.631)	-9.678_x000D_ (-10.558 to -8.79)	0
Estonia	234.729(401.898 to 136.1)	78.279(146.699 to 39.165)	49.831(85.314 to 28.878)	26.938(50.453 to 13.474)	-1.998_x000D_ (-2.116 to -1.88)	0
Eswatini	85.517(131.857 to 54.248)	84.723(129.341 to 53.43)	18.975(29.248 to 12.03)	15.638(23.879 to 9.864)	-0.645_x000D_ (-0.77 to -0.52)	0
Ethiopia	14562.586(22177.371 to 9334.576)	10342.748(15854.04 to 6796.767)	55.674(85.027 to 35.646)	18.149(27.824 to 11.923)	-4.111_x000D_ (-7.011 to -1.12)	0.007
Fiji	47.155(71.332 to 29.982)	40.129(62.011 to 25.619)	13.175(19.909 to 8.393)	11.348(17.532 to 7.247)	-0.44_x000D_ (-0.606 to -0.273)	0
Finland	409.655(738.364 to 216.619)	343.069(641.781 to 171.641)	31.153(56.167 to 16.475)	27.446(51.333 to 13.761)	-0.417_x000D_ (-0.491 to -0.342)	0
France	4140.036(7605.75 to 2176.056)	3579.795(6525.245 to 1814.442)	23.959(43.976 to 12.575)	21.066(38.38 to 10.693)	-0.408_x000D_ (-0.476 to -0.34)	0
Gabon	92.984(141.125 to 58.011)	110.05(174.767 to 65.804)	19.248(29.183 to 12.002)	13.126(20.842 to 7.852)	-1.224_x000D_ (-1.345 to -1.103)	0
Gambia	122.625(186.844 to 77.455)	187.317(294.571 to 113.309)	24.231(36.871 to 15.309)	15.007(23.595 to 9.076)	-1.58_x000D_ (-1.758 to -1.401)	0
Georgia	756.881(1251.391 to 447.167)	296.154(517.358 to 168.978)	41.102(67.981 to 24.274)	32.435(56.649 to 18.521)	-0.692_x000D_ (-1.25 to -0.131)	0.016
Germany	4038.907(7253.183 to 2143.015)	3411.263(6451.94 to 1759.315)	22.473(40.415 to 11.922)	20.632(39.024 to 10.628)	-0.269_x000D_ (-0.302 to -0.236)	0
Ghana	1338.204(2060.548 to 844.253)	2303.194(3642.46 to 1399.055)	17.429(26.755 to 10.989)	14.457(22.831 to 8.798)	-0.621_x000D_ (-0.723 to -0.518)	0
Greece	714.754(1313.62 to 363.764)	393.021(730.579 to 201.01)	22.895(42.073 to 11.67)	18.863(35.063 to 9.655)	-0.616_x000D_ (-0.688 to -0.544)	0
Greenland	3.362(5.424 to 2.001)	1.672(2.905 to 0.925)	19.861(32.047 to 11.821)	10.648(18.499 to 5.889)	-1.995_x000D_ (-2.07 to -1.92)	0
Grenada	15.576(25.274 to 9.415)	7.481(12.568 to 4.337)	38.189(62.048 to 23.083)	22.569(37.931 to 13.077)	-1.686_x000D_ (-1.886 to -1.485)	0
Guam	6.116(9.916 to 3.581)	4.487(7.361 to 2.628)	11.483(18.636 to 6.735)	8.93(14.674 to 5.239)	-0.799_x000D_ (-0.845 to -0.753)	0
Guatemala	4110.68(6695.039 to 2453.743)	2594.957(4208.937 to 1580.974)	93.713(153.405 to 55.65)	37.058(60.203 to 22.543)	-2.99_x000D_ (-3.183 to -2.795)	0
Guinea	738.785(1106.598 to 470.821)	1432.037(2154.263 to 876.223)	25.09(37.417 to 16.024)	20.275(30.43 to 12.382)	-0.688_x000D_ (-0.91 to -0.466)	0
Guinea-Bissau	139.444(207.034 to 89.114)	181.649(273.029 to 111.012)	25.557(37.808 to 16.342)	17.013(25.529 to 10.397)	-1.545_x000D_ (-2.328 to -0.755)	0
Guyana	111.196(170.941 to 70.021)	72.502(114.531 to 45.474)	29.369(45.173 to 18.492)	25.275(39.924 to 15.824)	-0.541_x000D_ (-0.713 to -0.368)	0
Haiti	1210.442(1814.78 to 787.897)	4972.132(8484.295 to 2883.56)	38.893(58.259 to 25.379)	89.601(152.93 to 51.937)	2.619_x000D_ (1.472 to 3.78)	0
Honduras	1253.441(1940.178 to 810.513)	1586.144(2477.94 to 972.443)	49.19(76.13 to 31.887)	35.085(54.802 to 21.47)	-1.062_x000D_ (-1.406 to -0.717)	0
Hungary	1862.657(3198.363 to 1071.25)	836.825(1588.319 to 422.187)	57.867(99.397 to 33.277)	41.798(79.447 to 21.095)	-1.045_x000D_ (-1.086 to -1.003)	0
Iceland	20.814(38.857 to 10.513)	19.448(36.159 to 9.84)	23.676(44.201 to 11.952)	20.895(38.863 to 10.575)	-0.404_x000D_ (-0.6 to -0.208)	0
India	102854.463(151685.86 to 70607.405)	75014.599(116853.09 to 49590.356)	25.872(38.143 to 17.775)	13.761(21.46 to 9.089)	-2.04_x000D_ (-2.21 to -1.87)	0
Indonesia	24447.31(37382.443 to 16340.34)	14086.959(21917.954 to 9269.79)	27.551(42.125 to 18.418)	14.816(23.077 to 9.733)	-1.995_x000D_ (-2.331 to -1.657)	0
Iran (Islamic Republic of)	14332.44(21503.769 to 9609.166)	3896.117(6672.237 to 2230.592)	47.612(71.436 to 31.889)	14.844(25.421 to 8.509)	-3.71_x000D_ (-3.822 to -3.599)	0
Iraq	7217.696(11351.404 to 4348.187)	8283.182(13878.583 to 4508.207)	75.383(118.586 to 45.425)	44.937(75.297 to 24.47)	-1.623_x000D_ (-1.998 to -1.246)	0
Ireland	372.693(684.051 to 192.275)	309.491(574.929 to 155.202)	26.061(47.841 to 13.443)	22.073(41.009 to 11.08)	-0.535_x000D_ (-0.583 to -0.488)	0
Israel	536.291(969.164 to 288.974)	692.221(1280.844 to 353.471)	26.154(47.277 to 14.098)	20.614(38.134 to 10.528)	-0.814_x000D_ (-1.155 to -0.472)	0
Italy	3975.827(7331.072 to 2072.07)	2446.789(4580.13 to 1227.494)	25.033(46.207 to 13.037)	21.064(39.449 to 10.571)	-0.532_x000D_ (-0.676 to -0.388)	0
Jamaica	326.737(536.69 to 191.028)	222.952(374.555 to 129.85)	29.219(48 to 17.075)	24.397(41.003 to 14.154)	-0.597_x000D_ (-0.667 to -0.527)	0
Japan	7769.771(14329.087 to 4057.718)	3595.908(6657.052 to 1837.191)	20.459(37.796 to 10.692)	15.444(28.625 to 7.881)	-0.894_x000D_ (-0.963 to -0.826)	0
Jordan	445.594(703.073 to 271.74)	717.825(1243.856 to 395.346)	21.618(34.119 to 13.173)	13.397(23.201 to 7.372)	-1.548_x000D_ (-1.629 to -1.467)	0
Kazakhstan	3047.832(4951.049 to 1837.783)	1752.459(2987.873 to 984.32)	46.611(75.709 to 28.105)	27.513(46.865 to 15.467)	-1.688_x000D_ (-1.742 to -1.634)	0
Kenya	2406.859(3624.066 to 1622.788)	3806.117(5769.483 to 2559.67)	18.536(27.866 to 12.504)	14.856(22.533 to 9.987)	-0.748_x000D_ (-0.885 to -0.609)	0
Kiribati	3.909(5.786 to 2.495)	4.71(6.999 to 3.075)	11.569(17.153 to 7.334)	8.884(13.199 to 5.799)	-1.015_x000D_ (-1.695 to -0.329)	0.004
Kuwait	157.455(264.221 to 92.618)	153.809(287.423 to 78.704)	24.368(40.892 to 14.332)	13.635(25.484 to 6.982)	-2.149_x000D_ (-2.596 to -1.7)	0
Kyrgyzstan	824.036(1313.544 to 501.596)	631.223(1056.372 to 367.666)	41.039(65.383 to 24.985)	23.501(39.285 to 13.688)	-1.82_x000D_ (-2.029 to -1.61)	0
Lao People's Democratic Republic	477.952(708.599 to 308.551)	353.87(550.606 to 221.365)	22.801(33.8 to 14.751)	11.763(18.307 to 7.361)	-2.187_x000D_ (-2.449 to -1.924)	0
Latvia	380.627(644.127 to 224.056)	110.471(201.733 to 57.27)	49.551(83.917 to 29.162)	27.581(50.35 to 14.306)	-1.877_x000D_ (-1.988 to -1.764)	0
Lebanon	1892.826(4741.065 to 766.917)	230.906(422.66 to 120.348)	144.831(363.363 to 58.529)	13.393(24.516 to 6.981)	-7.42_x000D_ (-8.026 to -6.811)	0
Lesotho	138.584(213.488 to 88.033)	145.495(216.699 to 91.802)	17.506(26.925 to 11.117)	16.527(24.616 to 10.433)	-0.165_x000D_ (-0.295 to -0.035)	0.013
Liberia	523.268(782.998 to 334.018)	382.627(590.82 to 237.343)	43.209(64.695 to 27.612)	13.82(21.338 to 8.576)	-3.668_x000D_ (-5.435 to -1.869)	0
Libya	739.734(1143.277 to 457.592)	1119.447(1832.539 to 651.862)	32.363(50.015 to 20.026)	47.744(78.067 to 27.833)	1.325_x000D_ (-0.176 to 2.85)	0.084
Lithuania	495.783(851.005 to 285.893)	155.362(286.02 to 82.122)	43.16(74.12 to 24.876)	27.954(51.449 to 14.77)	-1.389_x000D_ (-1.435 to -1.343)	0
Luxembourg	22.905(41.568 to 12.109)	28.722(52.923 to 14.406)	25.059(45.499 to 13.228)	20.288(37.398 to 10.186)	-0.658_x000D_ (-0.718 to -0.598)	0
Madagascar	1309.758(1975.275 to 822.313)	2241.929(3440.875 to 1354.355)	20.935(31.551 to 13.156)	15.163(23.264 to 9.161)	-1.04_x000D_ (-1.189 to -0.891)	0
Malawi	1082.052(1630.253 to 701.52)	1565.317(2419.484 to 976.327)	21.244(32.028 to 13.751)	14.443(22.34 to 9.009)	-1.254_x000D_ (-1.379 to -1.13)	0
Malaysia	1063.777(1684.54 to 656.646)	1035.039(1754.325 to 611.314)	13.08(20.71 to 8.076)	9.471(16.068 to 5.591)	-1.043_x000D_ (-1.117 to -0.968)	0
Maldives	23.511(36.896 to 14.259)	15.85(27.493 to 9.108)	20.306(31.876 to 12.329)	11.794(20.462 to 6.778)	-1.642_x000D_ (-2.04 to -1.242)	0
Mali	1094.13(1623.052 to 718.557)	3195.742(4844.748 to 2033.149)	24.77(36.631 to 16.3)	24.358(36.902 to 15.509)	-0.05_x000D_ (-0.505 to 0.408)	0.831
Malta	30.903(56.798 to 16.51)	19.062(35.127 to 9.565)	25.786(47.374 to 13.777)	22.236(41.001 to 11.155)	-0.462_x000D_ (-0.579 to -0.344)	0
Marshall Islands	3.14(4.641 to 2.092)	2.412(3.716 to 1.489)	12.46(18.351 to 8.289)	9.99(15.381 to 6.181)	-0.731_x000D_ (-0.852 to -0.61)	0
Mauritania	215.485(329.723 to 136.696)	313.358(500.102 to 190.102)	20.576(31.439 to 13.063)	13.779(21.986 to 8.357)	-1.316_x000D_ (-1.401 to -1.231)	0
Mauritius	59.791(97.975 to 36.04)	32.063(53.844 to 18.543)	13.372(21.893 to 8.07)	9.577(16.1 to 5.549)	-1.076_x000D_ (-1.122 to -1.03)	0
Mexico	23724.086(36964.889 to 15533.983)	12732.134(21432.916 to 7607.507)	54.272(84.583 to 35.522)	27.5(46.32 to 16.418)	-2.054_x000D_ (-2.437 to -1.67)	0
Micronesia (Federated States of)	7.922(11.841 to 5.132)	5.377(8.353 to 3.344)	14.128(21.13 to 9.148)	11.899(18.479 to 7.414)	-0.538_x000D_ (-0.92 to -0.154)	0.006
Monaco	1.083(2.025 to 0.542)	1.417(2.636 to 0.719)	20.915(39.151 to 10.48)	19.656(36.546 to 9.969)	-0.192_x000D_ (-0.248 to -0.135)	0
Mongolia	471.748(710.828 to 305.787)	372.807(618.718 to 221.191)	43.299(65.228 to 28.068)	31.615(52.394 to 18.692)	-1.014_x000D_ (-1.13 to -0.899)	0
Montenegro	115.848(212.457 to 60.888)	64.333(122.504 to 31.863)	51.51(94.508 to 27.078)	39.956(76.126 to 19.786)	-0.807_x000D_ (-0.911 to -0.702)	0
Morocco	3830.636(5893.794 to 2442.886)	2225.369(3647.788 to 1318.159)	31.275(48.108 to 19.954)	16.586(27.202 to 9.817)	-2.031_x000D_ (-2.088 to -1.973)	0
Mozambique	8028.429(14998.457 to 4064.675)	3158.949(4719.379 to 2007.072)	117.552(220.172 to 59.449)	18.629(27.812 to 11.853)	-5.755_x000D_ (-5.953 to -5.557)	0
Myanmar	7481.606(15150.149 to 3979.225)	8001.533(13019.07 to 4979.334)	38.705(78.342 to 20.598)	36.793(59.859 to 22.868)	-0.165_x000D_ (-0.89 to 0.566)	0.657
Namibia	349.043(579.053 to 203.057)	148.484(233.077 to 91.755)	47.649(79.065 to 27.717)	13.623(21.385 to 8.421)	-3.941_x000D_ (-4.126 to -3.756)	0
Nauru	0.646(0.977 to 0.404)	0.603(0.921 to 0.379)	13.404(20.249 to 8.371)	11.764(17.952 to 7.392)	-0.426_x000D_ (-0.533 to -0.318)	0
Nepal	2241.365(3445.849 to 1419.872)	2799.807(4482.123 to 1723.87)	23.196(35.591 to 14.706)	21.556(34.544 to 13.238)	-0.252_x000D_ (-1.032 to 0.533)	0.528
Netherlands	742.707(1353.603 to 377.906)	648.179(1184.687 to 330.625)	17.933(32.657 to 9.117)	16.258(29.706 to 8.268)	-0.309_x000D_ (-0.355 to -0.264)	0
New Zealand	600.022(1118.197 to 309.178)	675.935(1272.071 to 326.921)	50.767(94.674 to 26.102)	49.252(92.75 to 23.809)	-0.128_x000D_ (-0.227 to -0.03)	0.011
Nicaragua	3654.967(6805.874 to 1861.279)	826.569(1371.364 to 483.732)	174.675(325.936 to 88.828)	30.813(51.127 to 18.017)	-5.413_x000D_ (-5.74 to -5.085)	0
Niger	1105.731(1688.003 to 720.82)	3109.772(4700.938 to 1944.543)	25.604(39.062 to 16.764)	21.836(32.98 to 13.627)	-0.496_x000D_ (-0.668 to -0.325)	0
Nigeria	9847.888(14526.625 to 6787.924)	21878.168(32521.752 to 14868.898)	21.696(31.991 to 14.959)	17.683(26.27 to 12.023)	-0.658_x000D_ (-0.834 to -0.482)	0
Niue	0.121(0.19 to 0.076)	0.07(0.11 to 0.043)	11.946(18.631 to 7.498)	11.929(18.942 to 7.397)	-0.063_x000D_ (-0.37 to 0.245)	0.687
North Macedonia	426.897(719.079 to 252.746)	201.62(367.927 to 106.108)	58.513(98.553 to 34.622)	41.433(75.66 to 21.785)	-1.127_x000D_ (-1.212 to -1.041)	0
Northern Mariana Islands	2.054(3.361 to 1.216)	1.835(3.058 to 1.073)	12.501(20.458 to 7.402)	11.351(18.932 to 6.642)	-0.282_x000D_ (-0.482 to -0.082)	0.006
Norway	283.533(528.471 to 145.76)	247.938(467.689 to 127.32)	23.595(43.98 to 12.132)	18.633(35.148 to 9.569)	-0.761_x000D_ (-0.813 to -0.709)	0
Oman	274.409(429.233 to 171.456)	220.704(390.849 to 121.081)	30.488(47.615 to 19.092)	15.859(28.052 to 8.694)	-2.08_x000D_ (-2.157 to -2.003)	0
Pakistan	9116.474(13637.63 to 6091.092)	18364.522(27305.334 to 12167.04)	15.796(23.615 to 10.548)	16.976(25.239 to 11.249)	0.194_x000D_ (-0.234 to 0.623)	0.375
Palau	1.006(1.572 to 0.617)	0.584(0.961 to 0.347)	15.286(23.876 to 9.383)	11.982(19.742 to 7.14)	-0.783_x000D_ (-0.856 to -0.709)	0
Palestine	1396.473(2518.075 to 699.192)	662.991(1097.79 to 371.006)	130.327(234.793 to 65.312)	27.174(45.017 to 15.211)	-4.983_x000D_ (-5.469 to -4.494)	0
Panama	554.413(985.371 to 324.465)	459.575(812.04 to 257.594)	50.126(88.98 to 29.353)	29.6(52.302 to 16.584)	-1.685_x000D_ (-1.746 to -1.623)	0
Papua New Guinea	305.011(466.995 to 192.487)	696.196(1067.537 to 433.38)	15.01(22.983 to 9.473)	15.004(23.019 to 9.315)	-0.272_x000D_ (-1.205 to 0.67)	0.571
Paraguay	544.463(864.446 to 335.859)	524.61(886.911 to 302.236)	28.105(44.633 to 17.351)	18.582(31.402 to 10.708)	-1.333_x000D_ (-1.49 to -1.176)	0
Peru	4977(8099.288 to 3108.346)	2257.573(3947.631 to 1257.5)	46.994(76.501 to 29.351)	17.674(30.932 to 9.843)	-3.128_x000D_ (-3.256 to -3.001)	0
Philippines	8787.14(14270.874 to 5430.741)	7163.749(10728.927 to 4741.787)	28.172(45.789 to 17.396)	15.423(23.103 to 10.203)	-2.006_x000D_ (-2.483 to -1.526)	0
Poland	7268.61(12293.654 to 4348.554)	2630.688(4924.204 to 1330.356)	56.296(95.182 to 33.687)	32.693(61.205 to 16.523)	-1.747_x000D_ (-1.785 to -1.709)	0
Portugal	932.817(1621.858 to 524.74)	317.914(591.774 to 159.783)	27.487(47.819 to 15.483)	14.99(27.914 to 7.534)	-1.935_x000D_ (-1.97 to -1.9)	0
Puerto Rico	364.721(616.936 to 216.13)	174.974(322.24 to 86.976)	25.894(43.825 to 15.336)	22.669(42.074 to 11.126)	-0.431_x000D_ (-0.583 to -0.28)	0
Qatar	29.733(48.478 to 17.833)	71.647(132.066 to 36.253)	21.371(34.835 to 12.832)	13.179(24.239 to 6.668)	-1.552_x000D_ (-1.641 to -1.462)	0
Republic of Korea	5200.988(8936.592 to 3055.329)	1554.515(2910.91 to 779.591)	29.451(50.672 to 17.279)	16.564(30.963 to 8.322)	-1.851_x000D_ (-1.929 to -1.774)	0
Republic of Moldova	835.86(1365.909 to 514.533)	214.248(380.142 to 120.98)	53.279(87.042 to 32.801)	28.706(50.884 to 16.212)	-1.969_x000D_ (-2.069 to -1.868)	0
Romania	5905.777(9697.812 to 3599.251)	1799.613(3275.222 to 940.98)	73.026(119.852 to 44.497)	41.346(75.342 to 21.618)	-1.828_x000D_ (-1.895 to -1.761)	0
Russian Federation	25132.503(42436.562 to 15229.947)	8713.335(15781.265 to 4674.159)	54.582(92.142 to 33.086)	24.802(44.901 to 13.312)	-2.525_x000D_ (-2.611 to -2.439)	0
Rwanda	1021.531(1524.255 to 653.505)	1004.605(1531.465 to 626.191)	27.158(40.5 to 17.394)	15.53(23.684 to 9.677)	-2.089_x000D_ (-4.599 to 0.488)	0.111
Saint Kitts and Nevis	5.337(8.381 to 3.358)	4.058(6.854 to 2.325)	28.447(44.672 to 17.909)	25.336(42.848 to 14.531)	-0.361_x000D_ (-0.473 to -0.249)	0
Saint Lucia	16.364(25.905 to 10.028)	10.101(17.203 to 5.761)	24.231(38.366 to 14.853)	21.443(36.548 to 12.186)	-0.41_x000D_ (-0.516 to -0.304)	0
Saint Vincent and the Grenadines	14.079(22.329 to 8.719)	8.129(13.634 to 4.918)	25.192(39.954 to 15.6)	22.144(37.109 to 13.406)	-0.445_x000D_ (-0.648 to -0.241)	0
Samoa	11.239(17.152 to 7.186)	16.108(26.066 to 9.746)	12.307(18.778 to 7.872)	16.534(26.746 to 9.994)	0.738_x000D_ (0.187 to 1.291)	0.009
San Marino	1.529(2.835 to 0.767)	1.465(2.738 to 0.738)	22.153(41.176 to 11.134)	20.591(38.483 to 10.401)	-0.24_x000D_ (-0.299 to -0.182)	0
Sao Tome and Principe	17.544(26.907 to 10.988)	18.029(29.489 to 10.465)	26.194(40.084 to 16.439)	17.124(28.003 to 9.943)	-1.385_x000D_ (-1.451 to -1.319)	0
Saudi Arabia	2993.374(4839.951 to 1835.782)	2248.127(3973.062 to 1227.95)	38.277(61.826 to 23.524)	20.886(36.916 to 11.415)	-1.979_x000D_ (-2.119 to -1.838)	0
Senegal	844.498(1305.097 to 541.536)	1185.245(1902.083 to 721.605)	20.659(32.002 to 13.257)	14.787(23.729 to 9.004)	-1.067_x000D_ (-1.188 to -0.946)	0
Serbia	1818.111(3057.432 to 1059.121)	858.091(1599.362 to 429.113)	58.652(98.642 to 34.177)	39.532(73.759 to 19.732)	-1.289_x000D_ (-1.786 to -0.789)	0
Seychelles	4.518(7.161 to 2.731)	3.01(5.082 to 1.758)	14.024(22.249 to 8.481)	9.627(16.256 to 5.624)	-1.227_x000D_ (-1.554 to -0.898)	0
Sierra Leone	499.844(759.34 to 315.358)	829.254(1287.801 to 511.198)	24.81(37.633 to 15.601)	18.666(28.958 to 11.516)	-1.01_x000D_ (-2.289 to 0.286)	0.126
Singapore	218.058(383.877 to 121.854)	184.394(338.715 to 93.082)	21.319(37.39 to 11.943)	17.956(32.975 to 9.074)	-0.554_x000D_ (-0.595 to -0.514)	0
Slovakia	1073.123(1854.1 to 610.385)	471.631(892.062 to 234.087)	57.511(99.46 to 32.687)	40.626(76.829 to 20.15)	-1.126_x000D_ (-1.212 to -1.039)	0
Slovenia	418.863(764.613 to 225.082)	211.49(398.367 to 104.434)	69.572(127.046 to 37.355)	50.536(95.181 to 24.969)	-1.032_x000D_ (-1.119 to -0.945)	0
Solomon Islands	31.812(49.622 to 19.282)	50.134(75.606 to 31.632)	16.969(26.373 to 10.317)	15.501(23.363 to 9.784)	-0.37_x000D_ (-0.85 to 0.112)	0.132
Somalia	2236.682(7371.057 to 876.389)	4904.806(7554.176 to 2998.462)	52.733(175.701 to 20.478)	42.028(64.772 to 25.696)	-1.508_x000D_ (-2.687 to -0.315)	0.013
South Africa	4812.57(7998.927 to 3071.974)	2671.096(4121.469 to 1717.269)	27.365(45.538 to 17.46)	13.026(20.103 to 8.376)	-2.375_x000D_ (-2.48 to -2.271)	0
South Sudan	1327.911(2067.116 to 803.857)	1938.51(3049.167 to 1180.707)	42.799(66.64 to 25.9)	35.808(56.338 to 21.811)	-0.422_x000D_ (-1.193 to 0.355)	0.286
Spain	2546.012(4632.803 to 1335.202)	1850.994(3484.712 to 936.704)	19.954(36.39 to 10.489)	19.182(36.148 to 9.711)	-0.109_x000D_ (-0.205 to -0.012)	0.027
Sri Lanka	3339.322(5693.196 to 1867.332)	1619.419(2607.046 to 932.054)	44.362(75.58 to 24.817)	21.037(33.925 to 12.09)	-2.443_x000D_ (-4.303 to -0.548)	0.012
Sudan	4686.261(7086.126 to 2950.515)	4762.21(7428.543 to 2921.488)	45.469(68.822 to 28.645)	22.111(34.486 to 13.564)	-2.339_x000D_ (-2.986 to -1.688)	0
Suriname	80.359(195.538 to 37.125)	43.423(71.126 to 26.962)	45.913(111.797 to 21.215)	21.654(35.451 to 13.445)	-2.401_x000D_ (-2.536 to -2.266)	0
Sweden	546.158(1024.823 to 271.948)	499.366(944.945 to 254.734)	24.813(46.636 to 12.357)	19.721(37.316 to 10.053)	-0.732_x000D_ (-0.794 to -0.67)	0
Switzerland	502.609(941.818 to 250.801)	446.02(834.832 to 223.993)	29.984(56.172 to 14.962)	24.408(45.7 to 12.255)	-0.662_x000D_ (-0.774 to -0.55)	0
Syrian Arab Republic	2045.158(3458.155 to 1187.108)	8818.364(15950.826 to 4398.674)	29.603(50.194 to 17.157)	133.092(241.161 to 66.147)	5.035_x000D_ (4.015 to 6.065)	0
Taiwan (Province of China)	859.538(1430.23 to 501.329)	266.897(471.532 to 142.474)	11.08(18.454 to 6.472)	6.174(10.917 to 3.299)	-1.918_x000D_ (-2.41 to -1.424)	0
Tajikistan	969.912(1512.431 to 605.233)	1037.906(1677.033 to 637.15)	36.899(57.594 to 23.091)	24.862(40.201 to 15.285)	-0.762_x000D_ (-1.849 to 0.338)	0.174
Thailand	4298.661(6882.052 to 2666.246)	1623.158(2821.827 to 930.806)	17.516(28.05 to 10.852)	10.425(18.137 to 5.968)	-1.665_x000D_ (-1.754 to -1.576)	0
Timor-Leste	439.011(758.48 to 242.062)	73.063(113.952 to 45.817)	126.637(219.177 to 69.822)	10.407(16.248 to 6.523)	-8.075_x000D_ (-9.404 to -6.727)	0
Togo	424.095(651.866 to 271.335)	619.764(963.085 to 386.7)	21.226(32.597 to 13.583)	15.203(23.604 to 9.497)	-1.079_x000D_ (-1.212 to -0.945)	0
Tokelau	0.093(0.141 to 0.059)	0.048(0.079 to 0.029)	12.465(19.058 to 7.88)	8.789(14.258 to 5.249)	-1.124_x000D_ (-1.256 to -0.993)	0
Tonga	6.048(9.384 to 3.748)	4.437(6.961 to 2.69)	11.522(17.871 to 7.144)	9.215(14.457 to 5.581)	-0.831_x000D_ (-1.135 to -0.526)	0
Trinidad and Tobago	129.066(202.692 to 79.698)	94.378(154.395 to 56.831)	24.836(38.973 to 15.341)	24.106(39.382 to 14.508)	0.009_x000D_ (-0.141 to 0.159)	0.911
Tunisia	1247.458(2038.237 to 748.613)	593.607(1037.474 to 322.716)	31.234(51.032 to 18.748)	16.175(28.268 to 8.797)	-2.113_x000D_ (-2.193 to -2.033)	0
Turkey	7109.506(11123.638 to 4515.7)	3737.367(6569.499 to 2053.264)	26.127(40.891 to 16.578)	14.143(24.889 to 7.771)	-1.986_x000D_ (-2.206 to -1.764)	0
Turkmenistan	739.352(1172.659 to 463.935)	521.502(876.508 to 312.498)	41.482(65.775 to 26.051)	26.77(44.992 to 16.042)	-1.388_x000D_ (-1.515 to -1.261)	0
Tuvalu	0.556(0.832 to 0.358)	0.461(0.716 to 0.285)	14.543(21.782 to 9.322)	9.104(14.152 to 5.641)	-1.515_x000D_ (-1.654 to -1.375)	0
Uganda	6373.325(11360.655 to 3297.215)	3819.948(5933.077 to 2432.207)	70.989(126.86 to 36.591)	15.873(24.652 to 10.113)	-4.726_x000D_ (-5.069 to -4.383)	0
Ukraine	6955.914(12019.007 to 4041.439)	2742.565(4799.269 to 1566.232)	44.391(76.764 to 25.785)	29.298(51.277 to 16.735)	-1.345_x000D_ (-1.554 to -1.135)	0
United Arab Emirates	161.984(259.154 to 101.656)	245.249(421.571 to 139.798)	25.98(41.572 to 16.349)	14.643(25.157 to 8.366)	-1.836_x000D_ (-1.923 to -1.749)	0
United Kingdom	3353.692(6179.885 to 1789.503)	2793.88(5251.034 to 1418.162)	21.59(39.781 to 11.507)	16.883(31.733 to 8.57)	-0.781_x000D_ (-0.87 to -0.693)	0
United Republic of Tanzania	2928.606(4413.223 to 1869.341)	4974.396(7733.409 to 3135.198)	20.98(31.629 to 13.366)	16.524(25.688 to 10.411)	-0.788_x000D_ (-0.879 to -0.698)	0
United States of America	13307.398(24570.142 to 6971.725)	8248.792(15020.31 to 4183.086)	17.503(32.326 to 9.165)	9.343(17.026 to 4.741)	-2.1_x000D_ (-2.37 to -1.828)	0
United States Virgin Islands	10.954(17.603 to 6.513)	4.117(7.065 to 2.329)	25.646(41.228 to 15.238)	20.712(35.608 to 11.692)	-0.709_x000D_ (-0.866 to -0.551)	0
Uruguay	386.36(697.19 to 212.726)	254.9(465.824 to 131.129)	34.51(62.235 to 18.99)	25.687(46.975 to 13.204)	-0.966_x000D_ (-1.041 to -0.891)	0
Uzbekistan	3727.19(5953.459 to 2304.235)	2921.663(4774.681 to 1708.323)	37.377(59.693 to 23.122)	24.664(40.314 to 14.405)	-1.322_x000D_ (-1.405 to -1.24)	0
Vanuatu	13.192(20.91 to 8.028)	15.503(23.54 to 9.979)	16.654(26.213 to 10.205)	10.811(16.421 to 6.951)	-1.375_x000D_ (-2.051 to -0.694)	0
Venezuela (Bolivarian Republic of)	4815.092(7581.949 to 3044.271)	3439.046(5832.044 to 2002.586)	53.56(84.346 to 33.872)	37.768(64.036 to 21.974)	-1.144_x000D_ (-1.356 to -0.931)	0
Viet Nam	5464.158(8592.185 to 3351.196)	3665.954(6296.471 to 2124.131)	16.565(26.028 to 10.159)	11.593(19.904 to 6.724)	-1.158_x000D_ (-1.336 to -0.98)	0
Yemen	3137.83(4779.874 to 1981.527)	13407.016(22686.538 to 7550.533)	41.956(63.808 to 26.526)	77.803(131.644 to 43.846)	2.076_x000D_ (1.181 to 2.978)	0
Zambia	938.228(1407.918 to 613.72)	1467.404(2305.388 to 928.532)	21.085(31.657 to 13.777)	14.346(22.529 to 9.076)	-1.248_x000D_ (-1.378 to -1.118)	0
Zimbabwe	913.409(1386.376 to 568.6)	1084.031(1637.601 to 684.804)	15.783(23.938 to 9.837)	13.793(20.824 to 8.714)	-0.429_x000D_ (-0.587 to -0.271)	0
