# Supplementary material for: Global burden of amputation among children and adolescents from 1990 to 2021: systematic analysis of the Global Burden of Disease study 2021
Source: Front Public Health. 2025 Jun 27;13:1589309. doi: 10.3389/fpubh.2025.1589309 (PMC12277607; doi:10.3389/fpubh.2025.1589309)
Supplement: SUPPLEMENTARY TABLE S6 — Frontier of amputation incidence, prevalence, YLDs rate among children and adolescents and effective. [file Table_6.xlsx]

## Sheet: Incidence
Location	SDI	Rate of Incidence	Frontier Incidence	Effective difference	Effective difference rank (Age-standardized Incidence rank)	Rate of Prevalence	Frontier Prevalence	Effective difference	Effective difference rank (Age-standardized Prevalence rank)	Rate of YLDs	Frontier YLDs	Effective difference	Effective difference rank (Age-standardized YLDs rank)
Afghanistan	0.3372	1042.14_x000D_(622.441 to 1691.842)	82.645	959.494	204 (204)	5459.414_x000D_(3567.149 to 8379.01)	942.577	4516.84	198 (199)	123.537_x000D_(68.425 to 212.344)	15.549	107.988	203 (203)
Albania	0.70685	587.861_x000D_(411.413 to 846.468)	50.591	537.269	201 (201)	5503.968_x000D_(4485.335 to 6783.031)	525.559	4978.41	202 (202)	47.31_x000D_(24.207 to 88.057)	8.076	39.234	195 (195)
Algeria	0.659501	137.676_x000D_(104.892 to 180.645)	51.082	86.593	86 (81)	1401.157_x000D_(1208.701 to 1651.472)	525.379	875.777	89 (82)	15.26_x000D_(8.851 to 25.589)	8.055	7.205	82 (61)
American Samoa	0.723728	77.016_x000D_(58.412 to 102.415)	51.802	25.214	23 (14)	1099.404_x000D_(884.26 to 1416.209)	525.372	574.033	71 (53)	15.556_x000D_(9.463 to 24.987)	7.957	7.599	86 (67)
Andorra	0.869444	180.552_x000D_(123.527 to 266.669)	50.908	129.644	117 (114)	2003.44_x000D_(1601.769 to 2682.383)	525.314	1478.13	122 (119)	19.944_x000D_(9.948 to 36.898)	7.064	12.88	118 (107)
Angola	0.453722	93.484_x000D_(73.066 to 119.233)	61.943	31.541	34 (33)	1006.609_x000D_(870.448 to 1173.883)	657.61	348.999	37 (33)	14.513_x000D_(8.956 to 22.47)	10.414	4.099	50 (50)
Antigua and Barbuda	0.749887	287.037_x000D_(206.601 to 404.977)	50.924	236.112	172 (170)	2741.882_x000D_(2256.912 to 3342.224)	525.464	2216.42	162 (162)	26.336_x000D_(14.982 to 46.497)	8.061	18.275	155 (153)
Argentina	0.723123	296.906_x000D_(198.887 to 434.559)	50.847	246.059	175 (174)	2869.831_x000D_(2317.028 to 3532.279)	525.581	2344.25	169 (169)	27.392_x000D_(14.571 to 49.525)	8.014	19.378	162 (159)
Armenia	0.701833	274.936_x000D_(200.169 to 378.072)	50.732	224.204	168 (168)	3741.517_x000D_(3010.778 to 4745.086)	525.305	3216.21	186 (186)	49.718_x000D_(28.171 to 83.188)	7.922	41.796	199 (199)
Australia	0.844253	434.599_x000D_(279.618 to 654.64)	50.606	383.993	189 (189)	4584.05_x000D_(3617.227 to 5763.401)	525.464	4058.59	190 (190)	40.739_x000D_(19.705 to 78.387)	7.709	33.03	188 (186)
Austria	0.853837	196.946_x000D_(137.792 to 283.101)	51.018	145.928	136 (134)	2244.135_x000D_(1833.924 to 2875.464)	525.496	1718.64	151 (151)	22.376_x000D_(11.472 to 41.927)	7.571	14.805	139 (134)
Azerbaijan	0.694851	256.874_x000D_(186.117 to 350.728)	50.603	206.27	162 (162)	2823.523_x000D_(2348.81 to 3383.062)	525.466	2298.06	168 (168)	33.287_x000D_(20.068 to 55.061)	8.072	25.215	178 (176)
Bahamas	0.805021	176.444_x000D_(125.177 to 244.478)	50.927	125.517	113 (110)	2172.69_x000D_(1782.544 to 2666.547)	525.166	1647.52	144 (144)	24.582_x000D_(14.795 to 41.254)	7.985	16.597	148 (146)
Bahrain	0.753043	137.617_x000D_(101.967 to 184.095)	51.477	86.14	85 (80)	1413.049_x000D_(1206.666 to 1690.154)	525.465	887.584	91 (84)	13.207_x000D_(6.968 to 23.574)	7.87	5.337	63 (35)
Bangladesh	0.492421	87.878_x000D_(66.611 to 116.801)	61.595	26.283	27 (24)	950.871_x000D_(806.803 to 1155.966)	613.04	337.831	34 (23)	12.237_x000D_(7.43 to 19.342)	10.307	1.93	23 (30)
Barbados	0.746749	191.954_x000D_(135.658 to 267.31)	50.85	141.104	131 (129)	2027.732_x000D_(1701.28 to 2424.354)	525.412	1502.32	124 (123)	19.841_x000D_(11.003 to 34.163)	7.999	11.842	111 (105)
Belarus	0.784485	331.147_x000D_(235.722 to 458.605)	50.887	280.26	183 (183)	3140.296_x000D_(2610.858 to 3819.06)	525.286	2615.01	178 (178)	27.306_x000D_(13.998 to 50.509)	8.111	19.194	160 (158)
Belgium	0.853654	194.88_x000D_(134.18 to 283.708)	50.763	144.117	134 (132)	2158.746_x000D_(1725.441 to 2858.233)	525.424	1633.32	142 (142)	21.489_x000D_(10.962 to 40.301)	7.685	13.803	129 (124)
Belize	0.610229	219.007_x000D_(161.089 to 298.458)	51.306	167.701	146 (146)	1983.251_x000D_(1682.187 to 2359.806)	525.479	1457.77	119 (116)	22.709_x000D_(13.765 to 37.046)	7.929	14.78	138 (137)
Benin	0.373487	112.714_x000D_(89.219 to 143.632)	76.441	36.273	44 (69)	1281.517_x000D_(1109.162 to 1493.396)	891.568	389.949	42 (72)	17.556_x000D_(10.992 to 27.092)	13.511	4.045	49 (87)
Bermuda	0.821365	211.835_x000D_(147.848 to 298.198)	51.347	160.488	143 (143)	2231.891_x000D_(1864.244 to 2671.58)	525.036	1706.86	149 (149)	18.78_x000D_(9.357 to 34.938)	7.866	10.914	108 (97)
Bhutan	0.473062	140.828_x000D_(107.025 to 184.168)	61.94	78.888	84 (83)	1418.98_x000D_(1203.847 to 1684.686)	647.109	771.871	82 (85)	16.505_x000D_(9.801 to 26.668)	10.427	6.078	73 (74)
Bolivia (Plurinational State of)	0.599011	165.157_x000D_(123.727 to 221.68)	50.589	114.567	103 (101)	1636.531_x000D_(1390.177 to 1941.373)	525.244	1111.29	101 (98)	20.366_x000D_(12.659 to 32.719)	8.199	12.167	112 (111)
Bosnia and Herzegovina	0.723078	505.333_x000D_(337.783 to 736.004)	51.04	454.293	196 (196)	4853.374_x000D_(3963.437 to 5975.839)	525.594	4327.78	195 (195)	42.045_x000D_(21.912 to 78.01)	7.988	34.057	192 (191)
Botswana	0.642722	111.936_x000D_(87.736 to 143.703)	50.99	60.946	78 (68)	1172.427_x000D_(1023.65 to 1343.713)	525.352	647.075	79 (61)	15.461_x000D_(9.272 to 24.183)	8.02	7.441	84 (64)
Brazil	0.653044	181.754_x000D_(135.173 to 248.436)	50.358	131.396	122 (118)	1934.26_x000D_(1573.015 to 2465.38)	525.572	1408.69	118 (115)	23.407_x000D_(14.083 to 38.039)	8.145	15.262	140 (139)
Brunei Darussalam	0.810234	167.763_x000D_(116.893 to 239.771)	50.71	117.054	104 (102)	1830.324_x000D_(1536.301 to 2194.386)	525.27	1305.05	112 (109)	18.946_x000D_(10.318 to 33.206)	8.046	10.9	107 (100)
Bulgaria	0.768151	543.511_x000D_(376.983 to 768.319)	50.972	492.539	199 (199)	5190.42_x000D_(4280.572 to 6385.331)	525.333	4665.09	199 (198)	47.42_x000D_(25.765 to 86.027)	8.177	39.243	196 (196)
Burkina Faso	0.285118	160.42_x000D_(119.816 to 215.555)	90.377	70.043	80 (98)	1454.368_x000D_(1251.701 to 1687.061)	1172.9	281.472	28 (90)	22.871_x000D_(14.505 to 34.347)	17.578	5.293	62 (138)
Burundi	0.289374	117.552_x000D_(92.104 to 149.278)	96.116	21.436	18 (73)	1345.72_x000D_(1136.651 to 1612.205)	1147.77	197.951	15 (77)	22.363_x000D_(13.864 to 33.655)	17.537	4.825	54 (133)
Cabo Verde	0.533535	105.63_x000D_(80.476 to 138.312)	53.584	52.046	70 (61)	1210.53_x000D_(1043.627 to 1408.143)	525.202	685.328	81 (66)	13.816_x000D_(8.093 to 22.659)	8.855	4.961	55 (44)
Cambodia	0.473621	100.085_x000D_(76.084 to 132.555)	62.021	38.064	46 (50)	989.089_x000D_(832.759 to 1223.051)	650.893	338.197	35 (29)	13.225_x000D_(8.189 to 20.731)	10.383	2.842	32 (36)
Cameroon	0.479691	128.857_x000D_(99.606 to 167.639)	61.991	66.866	79 (76)	1306.458_x000D_(1110.995 to 1549.89)	640.965	665.493	80 (73)	19.61_x000D_(12.263 to 30.043)	10.372	9.238	98 (102)
Canada	0.873171	100.299_x000D_(70.333 to 141.933)	51.109	49.19	66 (51)	998.754_x000D_(836.844 to 1196.385)	524.947	473.807	56 (31)	9.454_x000D_(4.72 to 17.627)	6.309	3.145	36 (10)
Central African Republic	0.309168	311.957_x000D_(207.797 to 463.853)	83.452	228.505	169 (177)	2014.958_x000D_(1563.017 to 2660.408)	1107.24	907.715	94 (121)	42.786_x000D_(26.43 to 66.816)	17.145	25.641	179 (192)
Chad	0.240436	164.458_x000D_(124.847 to 218.199)	108.301	56.157	73 (100)	1441.071_x000D_(1246.916 to 1662.1)	1224.15	216.925	19 (88)	22.289_x000D_(13.887 to 33.195)	18.319	3.97	48 (132)
Chile	0.771515	326.962_x000D_(222.804 to 468.095)	51.643	275.319	181 (181)	3497.247_x000D_(2812.097 to 4315.013)	525.599	2971.65	183 (183)	31.61_x000D_(15.92 to 59.982)	8.065	23.546	174 (172)
China	0.72163	87.135_x000D_(63.821 to 121.87)	51.072	36.063	43 (23)	994.554_x000D_(825.211 to 1272.632)	525.394	469.16	54 (30)	10.32_x000D_(5.76 to 18.334)	8.055	2.265	26 (15)
Colombia	0.655443	264.408_x000D_(191.374 to 358.629)	51.097	213.311	165 (165)	2953.973_x000D_(2431.665 to 3566.457)	525.289	2428.68	172 (172)	29.604_x000D_(16.972 to 51.949)	8.063	21.54	171 (169)
Comoros	0.475979	99.785_x000D_(76.549 to 130.066)	61.972	37.813	45 (47)	1260.705_x000D_(1088.178 to 1474.022)	642.299	618.405	78 (71)	18.683_x000D_(11.612 to 29.07)	10.411	8.272	94 (96)
Congo	0.583075	86.59_x000D_(67.189 to 112.639)	51.056	35.534	41 (22)	936.967_x000D_(809.743 to 1089.531)	525.538	411.428	45 (20)	13.008_x000D_(7.869 to 20.125)	8.039	4.969	57 (31)
Cook Islands	0.77911	76.775_x000D_(55.604 to 107.717)	51.268	25.507	25 (13)	809.756_x000D_(680.298 to 1007.352)	525.38	284.376	29 (14)	8.621_x000D_(4.801 to 14.878)	7.823	0.798	7 (3)
Costa Rica	0.70034	262.024_x000D_(181.113 to 365.168)	50.688	211.336	164 (164)	3017.169_x000D_(2473.72 to 3665.6)	525.34	2491.83	174 (174)	28.584_x000D_(15.442 to 51.187)	7.979	20.605	167 (165)
Coted'Ivoire	0.425942	106.113_x000D_(82.973 to 135.077)	66.931	39.182	49 (62)	1260.29_x000D_(1088.814 to 1475.279)	680.407	579.883	72 (70)	17.172_x000D_(10.607 to 26.482)	12.883	4.289	52 (86)
Croatia	0.798341	438.762_x000D_(313.089 to 606.717)	50.732	388.03	190 (190)	4364.024_x000D_(3599.216 to 5293.636)	525.545	3838.48	189 (189)	37.331_x000D_(18.626 to 70.046)	8.073	29.257	183 (181)
Cuba	0.66873	249.265_x000D_(177.707 to 348.922)	50.777	198.488	160 (159)	2612.575_x000D_(2178.947 to 3100.69)	525.231	2087.34	158 (158)	23.784_x000D_(12.639 to 42.374)	8.026	15.759	143 (141)
Cyprus	0.835631	182.728_x000D_(126.699 to 263.723)	50.73	131.998	124 (121)	2033.023_x000D_(1642.907 to 2675.453)	525.545	1507.48	125 (124)	20.158_x000D_(10.389 to 37.949)	7.852	12.306	114 (108)
Czechia	0.82845	545.04_x000D_(365.869 to 795.201)	50.672	494.368	200 (200)	5460.27_x000D_(4475.219 to 6660.685)	525.241	4935.03	200 (200)	45.871_x000D_(22.857 to 85.481)	7.89	37.981	194 (194)
Democratic People's Republic of Korea	0.569855	52.217_x000D_(42.245 to 65.34)	50.702	1.515	2 (1)	557.39_x000D_(496.294 to 643.373)	525.464	31.927	2 (2)	7.74_x000D_(4.832 to 12.183)	7.74	0	2 (2)
Democratic Republic of the Congo	0.38318	124.402_x000D_(95.505 to 163.909)	76.265	48.137	63 (74)	1176.983_x000D_(1007.581 to 1391.517)	861.653	315.33	33 (63)	18.821_x000D_(11.737 to 28.431)	13.531	5.29	61 (98)
Denmark	0.896424	182.972_x000D_(124.241 to 268.028)	50.656	132.316	125 (122)	2085.273_x000D_(1667.206 to 2768.941)	525.432	1559.84	135 (135)	20.69_x000D_(10.147 to 38.962)	6.389	14.301	134 (115)
Djibouti	0.487958	109.848_x000D_(85.574 to 140.8)	62.02	47.828	62 (65)	1223.584_x000D_(1058.708 to 1415.769)	634.096	589.488	74 (68)	16.574_x000D_(10.266 to 26.04)	10.368	6.206	75 (79)
Dominica	0.746967	173.845_x000D_(127.268 to 239.018)	50.693	123.152	109 (107)	2173.685_x000D_(1791.639 to 2673.616)	525.34	1648.34	145 (145)	26.771_x000D_(16.04 to 43.115)	8.158	18.613	156 (155)
Dominican Republic	0.619388	187.051_x000D_(137.089 to 256.831)	51.132	135.919	128 (125)	1837.233_x000D_(1556.359 to 2173.93)	525.124	1312.11	113 (110)	21.05_x000D_(12.42 to 34.18)	8.059	12.99	120 (120)
Ecuador	0.661017	177.406_x000D_(132.492 to 236.817)	50.644	126.763	114 (111)	1801.024_x000D_(1533.268 to 2152.872)	525.662	1275.36	110 (107)	19.908_x000D_(11.811 to 33.039)	8.268	11.64	110 (106)
Egypt	0.606787	129.532_x000D_(99.141 to 165.735)	51.237	78.296	82 (78)	1327.703_x000D_(1151.18 to 1547.889)	525.357	802.346	83 (74)	16.247_x000D_(9.732 to 25.873)	8.213	8.033	93 (72)
El Salvador	0.563775	253.406_x000D_(182.311 to 345.816)	53.243	200.163	161 (160)	2764.567_x000D_(2282.497 to 3325.874)	525.586	2238.98	163 (163)	30.117_x000D_(17.637 to 50.85)	8.347	21.77	172 (170)
Equatorial Guinea	0.657857	83.683_x000D_(63.033 to 110.406)	50.95	32.734	37 (17)	953.806_x000D_(820.236 to 1121.748)	525.386	428.42	47 (24)	11.844_x000D_(7.338 to 19.103)	8.062	3.782	43 (26)
Eritrea	0.403864	105.189_x000D_(81.511 to 135.532)	76.119	29.07	31 (59)	1175.136_x000D_(1023.411 to 1352.317)	910.848	264.287	24 (62)	16.963_x000D_(10.631 to 25.497)	13.588	3.375	38 (82)
Estonia	0.844918	327.1_x000D_(230.039 to 455.53)	50.8	276.3	182 (182)	3153.529_x000D_(2615.598 to 3832.228)	524.482	2629.05	180 (180)	26.938_x000D_(13.474 to 50.453)	7.788	19.149	159 (156)
Eswatini	0.58546	172.841_x000D_(125.201 to 248.234)	50.719	122.121	107 (106)	1110.627_x000D_(969.396 to 1275.192)	525.24	585.387	73 (55)	15.638_x000D_(9.864 to 23.879)	7.937	7.7	89 (68)
Ethiopia	0.358823	200.871_x000D_(130.135 to 325.962)	76.799	124.072	111 (137)	1244.272_x000D_(1069.796 to 1451.931)	958.499	285.773	30 (69)	18.149_x000D_(11.923 to 27.824)	14.306	3.843	45 (91)
Fiji	0.675052	73.294_x000D_(56.244 to 95.622)	50.987	22.307	19 (12)	797.394_x000D_(682.435 to 968.034)	525.491	271.903	27 (13)	11.348_x000D_(7.247 to 17.532)	8.302	3.046	34 (20)
Finland	0.859831	233.447_x000D_(157.135 to 345.753)	51.111	182.335	152 (152)	2711.705_x000D_(2157.631 to 3665.493)	525.744	2185.96	160 (160)	27.446_x000D_(13.761 to 51.333)	7.356	20.091	165 (160)
France	0.838365	189.73_x000D_(131.877 to 272.937)	50.63	139.1	130 (128)	2123.723_x000D_(1716.355 to 2763.434)	525.495	1598.23	138 (138)	21.066_x000D_(10.693 to 38.38)	7.922	13.144	123 (122)
Gabon	0.634691	92.249_x000D_(70.965 to 120.24)	50.802	41.447	53 (31)	1019.206_x000D_(873.045 to 1191.161)	525.429	493.777	60 (36)	13.126_x000D_(7.852 to 20.842)	7.887	5.239	59 (33)
Gambia	0.409714	97.064_x000D_(74.393 to 125.854)	76.129	20.934	15 (43)	1135.152_x000D_(978.012 to 1327.378)	871.348	263.804	23 (59)	15.007_x000D_(9.076 to 23.595)	13.661	1.346	14 (58)
Georgia	0.732474	352.819_x000D_(267.136 to 469.451)	51.549	301.269	187 (187)	3149.902_x000D_(2618.525 to 3817.645)	525.578	2624.32	179 (179)	32.435_x000D_(18.521 to 56.649)	8.196	24.239	176 (174)
Germany	0.902957	181.653_x000D_(124.746 to 262.26)	50.665	130.988	120 (117)	2068.293_x000D_(1672.597 to 2712.795)	525.179	1543.11	131 (130)	20.632_x000D_(10.628 to 39.024)	6.694	13.938	130 (114)
Ghana	0.56493	95.785_x000D_(73.802 to 124.227)	53.171	42.614	54 (39)	1098.356_x000D_(940.569 to 1294.062)	525.489	572.868	70 (51)	14.457_x000D_(8.798 to 22.831)	8.312	6.145	74 (49)
Greece	0.791854	174.603_x000D_(121.495 to 250.438)	50.801	123.802	110 (108)	1917.83_x000D_(1555.112 to 2490.718)	525.544	1392.29	116 (113)	18.863_x000D_(9.655 to 35.063)	8.024	10.839	106 (99)
Greenland	0.82621	108.185_x000D_(78.459 to 149.605)	50.607	57.578	76 (64)	1019.515_x000D_(863.708 to 1218.642)	525.582	493.933	61 (37)	10.648_x000D_(5.889 to 18.499)	8.008	2.64	28 (18)
Grenada	0.668993	224.041_x000D_(162.569 to 309.8)	51	173.041	148 (147)	2106.701_x000D_(1760.287 to 2525.504)	524.763	1581.94	137 (136)	22.569_x000D_(13.077 to 37.931)	8.008	14.561	136 (135)
Guam	0.803982	73.151_x000D_(55.119 to 98.498)	50.797	22.354	20 (11)	762.384_x000D_(654.9 to 928.482)	525.554	236.83	20 (9)	8.93_x000D_(5.239 to 14.674)	7.811	1.119	12 (6)
Guatemala	0.539972	303.953_x000D_(219.823 to 414.288)	53.723	250.23	176 (175)	3129.396_x000D_(2606.973 to 3740.747)	525.581	2603.82	177 (177)	37.058_x000D_(22.543 to 60.203)	8.863	28.195	182 (180)
Guinea	0.336401	115.437_x000D_(91.779 to 146.378)	82.726	32.71	36 (72)	1385.09_x000D_(1200.444 to 1597.906)	978.459	406.631	44 (78)	20.275_x000D_(12.382 to 30.43)	15.033	5.242	60 (109)
Guinea-Bissau	0.35311	101.002_x000D_(79.577 to 128.05)	79.88	21.122	16 (54)	1141.634_x000D_(992.574 to 1321.135)	972.829	168.805	12 (60)	17.013_x000D_(10.397 to 25.529)	14.289	2.724	30 (84)
Guyana	0.650812	200.801_x000D_(152.258 to 265.259)	50.615	150.186	139 (136)	2020.638_x000D_(1724.676 to 2371.204)	525.372	1495.27	123 (122)	25.275_x000D_(15.824 to 39.924)	8.12	17.155	150 (150)
Haiti	0.448278	350.862_x000D_(257.48 to 483.084)	61.977	288.885	185 (185)	3692.735_x000D_(2986.474 to 4612.773)	658.525	3034.21	184 (185)	89.601_x000D_(51.937 to 152.93)	10.481	79.12	202 (202)
Honduras	0.513037	254.414_x000D_(185.639 to 341.877)	57.008	197.406	159 (161)	2820.135_x000D_(2363.786 to 3350.497)	551.355	2268.78	166 (167)	35.085_x000D_(21.47 to 54.802)	9.324	25.76	180 (177)
Hungary	0.790755	495.961_x000D_(332.056 to 734.372)	50.62	445.341	195 (195)	4964.391_x000D_(4059.819 to 6087.876)	525.386	4439.01	197 (197)	41.798_x000D_(21.095 to 79.447)	7.847	33.951	191 (189)
Iceland	0.876362	186.035_x000D_(127.5 to 271.632)	50.667	135.368	127 (124)	2106.799_x000D_(1703.68 to 2740.474)	525.372	1581.43	136 (137)	20.895_x000D_(10.575 to 38.863)	6.525	14.371	135 (118)
India	0.575402	96.752_x000D_(73.321 to 128.999)	51.882	44.87	59 (42)	1020.799_x000D_(867.875 to 1275.609)	525.453	495.347	62 (38)	13.761_x000D_(9.089 to 21.46)	7.877	5.884	70 (41)
Indonesia	0.656868	99.589_x000D_(75.762 to 129.332)	51.175	48.415	64 (46)	1120.421_x000D_(976.69 to 1308.283)	525.273	595.148	76 (57)	14.816_x000D_(9.733 to 23.077)	8.079	6.736	78 (53)
Iran (Islamic Republic of)	0.697207	153.331_x000D_(117.837 to 198.324)	51.037	102.294	99 (95)	1411.596_x000D_(1209.236 to 1665.339)	525.62	885.976	90 (83)	14.844_x000D_(8.509 to 25.421)	8.105	6.739	79 (54)
Iraq	0.662626	224.099_x000D_(172.109 to 288.833)	51.264	172.836	147 (148)	3448.977_x000D_(2530.469 to 4854.067)	525.334	2923.64	181 (181)	44.937_x000D_(24.47 to 75.297)	7.929	37.008	193 (193)
Ireland	0.873754	193.929_x000D_(133.286 to 282.513)	51.137	142.792	132 (130)	2230.02_x000D_(1789.653 to 2905.876)	525.39	1704.63	148 (148)	22.073_x000D_(11.08 to 41.009)	6.544	15.529	142 (128)
Israel	0.809012	199.3_x000D_(140.114 to 281.452)	50.898	148.402	137 (135)	2077.385_x000D_(1693.041 to 2668.729)	525.552	1551.83	133 (132)	20.614_x000D_(10.528 to 38.134)	8.111	12.503	116 (113)
Italy	0.805774	182.656_x000D_(127.279 to 267.398)	51.051	131.605	123 (120)	2073.738_x000D_(1618.284 to 2873.239)	525.482	1548.26	132 (131)	21.064_x000D_(10.571 to 39.449)	8.07	12.995	121 (121)
Jamaica	0.683263	239.321_x000D_(172.174 to 329.436)	51.349	187.972	154 (154)	2285.414_x000D_(1917.525 to 2716.643)	525.448	1759.97	152 (152)	24.397_x000D_(14.154 to 41.003)	8.181	16.216	146 (144)
Japan	0.871242	153.15_x000D_(106.382 to 219.809)	51.106	102.044	98 (94)	1649.05_x000D_(1378.105 to 1985.69)	525.629	1123.42	102 (99)	15.444_x000D_(7.881 to 28.625)	6.48	8.964	96 (63)
Jordan	0.725307	129.236_x000D_(97.672 to 170.136)	50.73	78.507	83 (77)	1332.058_x000D_(1141.057 to 1591.113)	525.239	806.819	84 (75)	13.397_x000D_(7.372 to 23.201)	7.834	5.563	66 (38)
Kazakhstan	0.725144	285.998_x000D_(210.337 to 392.899)	50.606	235.392	171 (169)	2733.267_x000D_(2275.13 to 3305.774)	525.611	2207.66	161 (161)	27.513_x000D_(15.467 to 46.865)	8.172	19.341	161 (162)
Kenya	0.523768	95.044_x000D_(72.171 to 123.027)	54.241	40.803	52 (36)	1080.94_x000D_(936.902 to 1244.786)	525.552	555.388	67 (46)	14.856_x000D_(9.987 to 22.533)	8.88	5.976	71 (55)
Kiribati	0.527187	53.633_x000D_(41.172 to 70.099)	53.565	0.068	1 (3)	526.228_x000D_(459.83 to 624.622)	525.268	0.96	1 (1)	8.884_x000D_(5.799 to 13.199)	8.858	0.026	5 (5)
Kuwait	0.846651	146.281_x000D_(107.295 to 198.352)	50.593	95.687	92 (86)	1528.844_x000D_(1303.954 to 1824.481)	525.462	1003.38	97 (93)	13.635_x000D_(6.982 to 25.484)	7.754	5.881	69 (40)
Kyrgyzstan	0.603979	231.154_x000D_(168.792 to 313.411)	50.577	180.577	150 (150)	2167.698_x000D_(1820.805 to 2600.565)	525.166	1642.53	143 (143)	23.501_x000D_(13.688 to 39.285)	8.041	15.459	141 (140)
Lao People's Democratic Republic	0.489136	85.838_x000D_(66.031 to 110.14)	61.629	24.209	21 (20)	843.793_x000D_(729.389 to 1000.756)	635.355	208.439	17 (15)	11.763_x000D_(7.361 to 18.307)	10.378	1.385	17 (23)
Latvia	0.830664	321.938_x000D_(228.109 to 447.845)	50.631	271.306	180 (180)	3080.658_x000D_(2562.469 to 3705.865)	525.552	2555.11	175 (175)	27.581_x000D_(14.306 to 50.35)	7.838	19.743	164 (163)
Lebanon	0.744746	148.525_x000D_(111.542 to 197.552)	50.932	97.593	94 (87)	1424.661_x000D_(1217.294 to 1698.732)	525.537	899.124	92 (86)	13.393_x000D_(6.981 to 24.516)	7.939	5.454	64 (37)
Lesotho	0.510393	114.073_x000D_(91.101 to 144.03)	56.865	57.208	74 (71)	1093.273_x000D_(966.196 to 1247.707)	549.333	543.94	66 (49)	16.527_x000D_(10.433 to 24.616)	9.264	7.264	83 (76)
Liberia	0.352442	89.25_x000D_(68.991 to 115.427)	82.708	6.542	5 (25)	1013.418_x000D_(872.385 to 1196.401)	926.151	87.267	5 (35)	13.82_x000D_(8.576 to 21.338)	13.82	0	2 (45)
Libya	0.725771	177.954_x000D_(135.265 to 236.298)	50.956	126.998	115 (112)	3455.664_x000D_(2638.061 to 4644.581)	525.382	2930.28	182 (182)	47.744_x000D_(27.833 to 78.067)	8.116	39.628	197 (197)
Lithuania	0.856484	317.311_x000D_(222.387 to 447.027)	51.252	266.059	179 (179)	3091.466_x000D_(2562.649 to 3737.446)	525.19	2566.28	176 (176)	27.954_x000D_(14.77 to 51.449)	7.478	20.477	166 (164)
Luxembourg	0.884429	188.177_x000D_(130.415 to 270.718)	50.991	137.186	129 (127)	2047.129_x000D_(1645.43 to 2680.874)	525.129	1522	127 (126)	20.288_x000D_(10.186 to 37.398)	6.847	13.442	126 (110)
Madagascar	0.400247	100.645_x000D_(77.355 to 130.582)	76.204	24.441	22 (52)	1062.59_x000D_(920.952 to 1226.203)	874.278	188.312	14 (44)	15.163_x000D_(9.161 to 23.264)	13.564	1.599	20 (59)
Malawi	0.384554	93.656_x000D_(72.123 to 121.737)	76.252	17.405	9 (34)	1021.731_x000D_(880.492 to 1202.359)	869.7	152.031	10 (39)	14.443_x000D_(9.009 to 22.34)	13.607	0.837	9 (48)
Malaysia	0.742524	90.164_x000D_(67.205 to 119.717)	51.176	38.988	48 (28)	873.072_x000D_(752.243 to 1041.03)	525.331	347.741	36 (16)	9.471_x000D_(5.591 to 16.068)	8.104	1.367	15 (11)
Maldives	0.650887	96.553_x000D_(70.853 to 128.786)	50.735	45.819	60 (41)	1116.276_x000D_(934.262 to 1369.04)	524.981	591.294	75 (56)	11.794_x000D_(6.778 to 20.462)	8.125	3.67	41 (25)
Mali	0.26858	152.162_x000D_(118.109 to 198.311)	94.688	57.474	75 (93)	1600.999_x000D_(1367.962 to 1906.796)	1167.96	433.038	48 (95)	24.358_x000D_(15.509 to 36.902)	18.113	6.245	76 (143)
Malta	0.801585	202.549_x000D_(139.755 to 291.389)	50.563	151.986	141 (140)	2239.314_x000D_(1799.957 to 2956.235)	525.372	1713.94	150 (150)	22.236_x000D_(11.155 to 41.001)	8.067	14.169	131 (131)
Marshall Islands	0.574091	68.461_x000D_(52.989 to 89.132)	50.668	17.793	10 (8)	660.428_x000D_(571.775 to 792.609)	525.489	134.938	9 (5)	9.99_x000D_(6.181 to 15.381)	7.879	2.111	24 (14)
Mauritania	0.498945	92.958_x000D_(71.41 to 121.003)	59.881	33.077	38 (32)	1079.716_x000D_(931.709 to 1267.106)	608.446	471.27	55 (45)	13.779_x000D_(8.357 to 21.986)	9.893	3.885	46 (42)
Mauritius	0.71826	84.155_x000D_(61.893 to 112.49)	50.676	33.479	39 (18)	881.556_x000D_(756.219 to 1052.001)	525.599	355.957	39 (18)	9.577_x000D_(5.549 to 16.1)	8.125	1.451	18 (12)
Mexico	0.664575	241.785_x000D_(171.036 to 334.354)	51.197	190.588	155 (155)	2558.468_x000D_(2101.996 to 3087.582)	525.3	2033.17	156 (156)	27.5_x000D_(16.418 to 46.32)	7.974	19.527	163 (161)
Micronesia (Federated States of)	0.587535	70.092_x000D_(53.869 to 91.048)	51.065	19.027	12 (10)	783.554_x000D_(667.409 to 955.839)	525.509	258.045	22 (11)	11.899_x000D_(7.414 to 18.479)	8.105	3.794	44 (27)
Monaco	0.908263	178.983_x000D_(122.09 to 259.922)	50.87	128.113	116 (113)	1997.765_x000D_(1605.121 to 2619.088)	525.429	1472.34	121 (118)	19.656_x000D_(9.969 to 36.546)	7.194	12.463	115 (103)
Mongolia	0.617622	314.032_x000D_(234.225 to 425.829)	50.858	263.174	178 (178)	2817.879_x000D_(2357.961 to 3422.458)	525.336	2292.54	167 (166)	31.615_x000D_(18.692 to 52.394)	7.876	23.738	175 (173)
Montenegro	0.795801	494.291_x000D_(334.35 to 717.797)	50.876	443.415	194 (194)	4810.332_x000D_(3931.244 to 5944.675)	525.463	4284.87	194 (194)	39.956_x000D_(19.786 to 76.126)	8.082	31.874	186 (184)
Morocco	0.562698	149.771_x000D_(115.685 to 193.423)	53.467	96.304	93 (88)	1441.984_x000D_(1241.244 to 1703.097)	525.376	916.609	95 (89)	16.586_x000D_(9.817 to 27.202)	8.859	7.727	90 (80)
Mozambique	0.326463	127.084_x000D_(97.718 to 166.127)	84.403	42.681	55 (75)	1189.502_x000D_(1031.252 to 1381.225)	980.29	209.212	18 (64)	18.629_x000D_(11.853 to 27.812)	15.875	2.754	31 (93)
Myanmar	0.533901	287.749_x000D_(197.646 to 426.823)	53.738	234.011	170 (171)	2150.7_x000D_(1702.899 to 2746.854)	525.429	1625.27	140 (140)	36.793_x000D_(22.868 to 59.859)	8.858	27.935	181 (179)
Namibia	0.617565	99.974_x000D_(77.841 to 129.521)	50.564	49.41	67 (49)	1055.245_x000D_(923.282 to 1221.248)	525.407	529.839	65 (43)	13.623_x000D_(8.421 to 21.385)	8.046	5.577	67 (39)
Nauru	0.625178	80.491_x000D_(61.854 to 105.478)	51.863	28.628	30 (16)	796.788_x000D_(682.44 to 966.016)	525.536	271.252	26 (12)	11.764_x000D_(7.392 to 17.952)	8.125	3.639	40 (24)
Nepal	0.433175	113.667_x000D_(84.497 to 152.039)	62.902	50.765	69 (70)	1481.19_x000D_(1180.379 to 1914.802)	658.481	822.709	85 (92)	21.556_x000D_(13.238 to 34.544)	12.419	9.137	97 (125)
Netherlands	0.888464	150.552_x000D_(104.109 to 215.68)	51.078	99.474	97 (90)	1676.203_x000D_(1372.334 to 2130.792)	525.599	1150.6	105 (102)	16.258_x000D_(8.268 to 29.706)	6.249	10.009	101 (73)
New Zealand	0.849442	511.989_x000D_(353.295 to 725.507)	50.954	461.036	197 (197)	5493.584_x000D_(4357.373 to 6832.89)	524.816	4968.77	201 (201)	49.252_x000D_(23.809 to 92.75)	7.81	41.442	198 (198)
Nicaragua	0.523958	246.822_x000D_(176.06 to 337.887)	53.941	192.881	157 (158)	2783.31_x000D_(2294.517 to 3333.996)	525.478	2257.83	165 (165)	30.813_x000D_(18.017 to 51.127)	8.875	21.938	173 (171)
Niger	0.168073	144.616_x000D_(110.944 to 189.368)	112.082	32.535	35 (84)	1394.232_x000D_(1189.827 to 1644.706)	1343.56	50.675	3 (80)	21.836_x000D_(13.627 to 32.98)	20.019	1.818	21 (127)
Nigeria	0.503391	111.485_x000D_(87.089 to 144.17)	59.146	52.339	71 (67)	1220.039_x000D_(1054.533 to 1425.919)	624.644	595.395	77 (67)	17.683_x000D_(12.023 to 26.27)	10.121	7.562	85 (89)
Niue	0.726222	78.262_x000D_(59.172 to 103.974)	50.848	27.414	29 (15)	927.5_x000D_(777.289 to 1144.58)	525.559	401.941	43 (19)	11.929_x000D_(7.397 to 18.942)	8.042	3.887	47 (28)
North Macedonia	0.75063	488.433_x000D_(327.959 to 704.167)	50.855	437.578	193 (193)	4692.03_x000D_(3813.365 to 5773.727)	525.205	4166.83	192 (192)	41.433_x000D_(21.785 to 75.66)	8.105	33.327	190 (188)
Northern Mariana Islands	0.771535	91.029_x000D_(68.535 to 122.047)	51.121	39.908	51 (30)	980.239_x000D_(839.123 to 1192.175)	525.431	454.807	51 (26)	11.351_x000D_(6.642 to 18.932)	8.154	3.198	37 (21)
Norway	0.916133	172.767_x000D_(120.911 to 246.024)	50.63	122.137	108 (105)	1909.674_x000D_(1564.304 to 2423.013)	525.391	1384.28	114 (111)	18.633_x000D_(9.569 to 35.148)	6.393	12.24	113 (94)
Oman	0.773392	163.353_x000D_(125.229 to 215.657)	51.762	111.591	102 (99)	1616.854_x000D_(1394.926 to 1901.488)	525.59	1091.26	100 (97)	15.859_x000D_(8.694 to 28.052)	8.056	7.803	91 (69)
Pakistan	0.504029	89.597_x000D_(70.391 to 116)	59.921	29.675	32 (27)	1053.199_x000D_(897.928 to 1251.729)	631.928	421.271	46 (42)	16.976_x000D_(11.249 to 25.239)	10.24	6.736	77 (83)
Palau	0.754047	99.958_x000D_(76.156 to 133.266)	50.899	49.059	65 (48)	966.971_x000D_(817.022 to 1181.746)	525.506	441.464	50 (25)	11.982_x000D_(7.14 to 19.742)	7.825	4.157	51 (29)
Palestine	0.631012	205.9_x000D_(153.497 to 277.061)	51.229	154.672	142 (142)	2155.655_x000D_(1680.733 to 2849.875)	525.369	1630.29	141 (141)	27.174_x000D_(15.211 to 45.017)	8.097	19.077	158 (157)
Panama	0.708865	260.462_x000D_(185.206 to 358.034)	50.792	209.67	163 (163)	2986.703_x000D_(2469.817 to 3593.879)	525.445	2461.26	173 (173)	29.6_x000D_(16.584 to 52.302)	8.084	21.516	170 (168)
Papua New Guinea	0.417797	103.987_x000D_(80.059 to 137.481)	65.653	38.335	47 (57)	938.56_x000D_(793.721 to 1171.82)	671.441	267.119	25 (21)	15.004_x000D_(9.315 to 23.019)	13.101	1.903	22 (57)
Paraguay	0.635718	183.348_x000D_(135.9 to 247.995)	50.81	132.538	126 (123)	1665.152_x000D_(1355.862 to 2111.937)	525.125	1140.03	104 (101)	18.582_x000D_(10.708 to 31.402)	8.46	10.122	103 (92)
Peru	0.662054	175.826_x000D_(129.723 to 238.44)	50.692	125.134	112 (109)	1731.768_x000D_(1466.427 to 2066.404)	525.561	1206.21	107 (104)	17.674_x000D_(9.843 to 30.932)	8.041	9.633	99 (88)
Philippines	0.651219	90.577_x000D_(69.388 to 117.999)	51	39.577	50 (29)	1048.795_x000D_(871.994 to 1267.277)	525.498	523.298	63 (41)	15.423_x000D_(10.203 to 23.103)	7.773	7.65	87 (62)
Poland	0.812043	411.137_x000D_(274.896 to 596.324)	50.807	360.33	188 (188)	3922.047_x000D_(3186.981 to 4831.782)	524.962	3397.09	188 (187)	32.693_x000D_(16.523 to 61.205)	8.119	24.574	177 (175)
Portugal	0.744152	137.466_x000D_(97.521 to 194.004)	50.721	86.745	87 (79)	1534.172_x000D_(1263.476 to 1930.307)	525.152	1009.02	98 (94)	14.99_x000D_(7.534 to 27.914)	7.82	7.17	81 (56)
Puerto Rico	0.825526	235.301_x000D_(169.717 to 321.991)	50.938	184.363	153 (153)	2561.212_x000D_(2085.117 to 3309.592)	525.453	2035.76	157 (157)	22.669_x000D_(11.126 to 42.074)	8.097	14.572	137 (136)
Qatar	0.846861	150.199_x000D_(111.736 to 201.671)	50.921	99.278	96 (89)	1480.198_x000D_(1262.794 to 1766.233)	525.622	954.576	96 (91)	13.179_x000D_(6.668 to 24.239)	7.698	5.481	65 (34)
Republic of Korea	0.886675	158.48_x000D_(110.789 to 227.532)	51.301	107.179	101 (97)	1735.322_x000D_(1431.522 to 2147.563)	525.221	1210.1	108 (105)	16.564_x000D_(8.322 to 30.963)	6.453	10.112	102 (78)
Republic of Moldova	0.732215	294.767_x000D_(214.415 to 401.206)	51.032	243.735	174 (173)	2914.809_x000D_(2457.146 to 3459.667)	525.523	2389.29	170 (170)	28.706_x000D_(16.212 to 50.884)	8.052	20.654	168 (166)
Romania	0.768454	486.254_x000D_(330.396 to 698.077)	50.967	435.287	192 (192)	4676.662_x000D_(3834.455 to 5745.211)	525.363	4151.3	191 (191)	41.346_x000D_(21.618 to 75.342)	8.139	33.207	189 (187)
Russian Federation	0.808536	294.064_x000D_(215.344 to 399.878)	50.879	243.186	173 (172)	2701.754_x000D_(2265.764 to 3263.973)	525.396	2176.36	159 (159)	24.802_x000D_(13.312 to 44.901)	8.138	16.665	149 (148)
Rwanda	0.435589	93.961_x000D_(72.411 to 121.029)	68.64	25.321	24 (35)	1090.829_x000D_(945.673 to 1276.19)	656.718	434.111	49 (48)	15.53_x000D_(9.677 to 23.684)	12.43	3.101	35 (66)
Saint Kitts and Nevis	0.754987	273.98_x000D_(198.524 to 381.106)	51.102	222.879	167 (167)	2443.379_x000D_(2053.836 to 2927.099)	525.15	1918.23	153 (153)	25.336_x000D_(14.531 to 42.848)	8.084	17.252	151 (151)
Saint Lucia	0.67251	200.919_x000D_(145.663 to 280.683)	50.671	150.248	140 (138)	2042.735_x000D_(1715.069 to 2435.026)	525.132	1517.6	126 (125)	21.443_x000D_(12.186 to 36.548)	7.889	13.554	127 (123)
Saint Vincent and the Grenadines	0.637196	202.168_x000D_(147.747 to 278.761)	52.019	150.15	138 (139)	1987.022_x000D_(1669.685 to 2373.229)	525.158	1461.86	120 (117)	22.144_x000D_(13.406 to 37.109)	7.959	14.184	132 (130)
Samoa	0.593393	69.352_x000D_(52.363 to 92.612)	50.766	18.586	11 (9)	1096.213_x000D_(865.764 to 1443.827)	525.479	570.734	69 (50)	16.534_x000D_(9.994 to 26.746)	7.971	8.563	95 (77)
San Marino	0.888005	194.479_x000D_(134.102 to 279.292)	50.662	143.817	133 (131)	2124.718_x000D_(1707.044 to 2761.781)	525.321	1599.4	139 (139)	20.591_x000D_(10.401 to 38.483)	6.354	14.238	133 (112)
Sao Tome and Principe	0.505414	151.562_x000D_(116.614 to 198.893)	58.045	93.517	89 (92)	1399.607_x000D_(1189.348 to 1710.442)	556.631	842.975	86 (81)	17.124_x000D_(9.943 to 28.003)	9.438	7.686	88 (85)
Saudi Arabia	0.815143	243.783_x000D_(182.092 to 328.573)	51.086	192.696	156 (156)	2199.089_x000D_(1849.046 to 2661.711)	525.483	1673.61	146 (146)	20.886_x000D_(11.415 to 36.916)	7.876	13.01	122 (117)
Senegal	0.408054	97.312_x000D_(75.301 to 126.044)	75.93	21.382	17 (44)	1110.32_x000D_(951.03 to 1306.273)	858.499	251.821	21 (54)	14.787_x000D_(9.004 to 23.729)	13.802	0.984	10 (52)
Serbia	0.792416	482.665_x000D_(321.607 to 702.558)	50.909	431.757	191 (191)	4723.508_x000D_(3839.216 to 5805.488)	524.805	4198.7	193 (193)	39.532_x000D_(19.732 to 73.759)	8.053	31.479	185 (183)
Seychelles	0.730151	85.984_x000D_(63.779 to 114.979)	51.342	34.641	40 (21)	874.739_x000D_(748.499 to 1053.22)	525.157	349.582	38 (17)	9.627_x000D_(5.624 to 16.256)	8.245	1.382	16 (13)
Sierra Leone	0.358666	102.919_x000D_(80.927 to 131.276)	76.967	25.952	26 (56)	1335.19_x000D_(1146.018 to 1565.035)	954.799	380.391	41 (76)	18.666_x000D_(11.516 to 28.958)	14.083	4.584	53 (95)
Singapore	0.856098	181.964_x000D_(125.351 to 264.265)	50.726	131.238	121 (119)	1916.324_x000D_(1577.987 to 2356.54)	525.556	1390.77	115 (112)	17.956_x000D_(9.074 to 32.975)	7.301	10.655	105 (90)
Slovakia	0.810611	518.456_x000D_(351.797 to 751.268)	51.51	466.946	198 (198)	4903.451_x000D_(3975.494 to 6107.852)	524.514	4378.94	196 (196)	40.626_x000D_(20.15 to 76.829)	8.147	32.479	187 (185)
Slovenia	0.842431	613.907_x000D_(415.36 to 885.133)	50.872	563.036	202 (202)	6046.686_x000D_(4971.039 to 7380.486)	525.536	5521.15	203 (203)	50.536_x000D_(24.969 to 95.181)	7.815	42.721	200 (200)
Solomon Islands	0.42936	84.99_x000D_(64.56 to 111.707)	65.215	19.774	13 (19)	985.459_x000D_(806.707 to 1255.294)	679.692	305.767	32 (27)	15.501_x000D_(9.784 to 23.363)	12.785	2.716	29 (65)
Somalia	0.0776881	205.392_x000D_(149.206 to 283.043)	127.7	77.692	81 (141)	2084.851_x000D_(1643.319 to 2684.361)	1713.89	370.964	40 (134)	42.028_x000D_(25.696 to 64.772)	31.778	10.25	104 (190)
South Africa	0.679627	95.367_x000D_(74.094 to 122.094)	51.153	44.214	57 (37)	1004.443_x000D_(884.639 to 1150.968)	525.276	479.167	58 (32)	13.026_x000D_(8.376 to 20.103)	8.058	4.968	56 (32)
South Sudan	0.278371	187.129_x000D_(140.125 to 252.166)	93.007	94.122	90 (126)	2003.694_x000D_(1573.152 to 2580.412)	1155.16	848.532	87 (120)	35.808_x000D_(21.811 to 56.338)	17.984	17.824	153 (178)
Spain	0.769284	172.337_x000D_(117.356 to 250.272)	50.771	121.566	106 (104)	1929.6_x000D_(1553.544 to 2544.427)	524.865	1404.73	117 (114)	19.182_x000D_(9.711 to 36.148)	7.916	11.266	109 (101)
Sri Lanka	0.701535	105.406_x000D_(78.766 to 138.702)	50.802	54.604	72 (60)	1692.28_x000D_(1365.625 to 2143.962)	525.119	1167.16	106 (103)	21.037_x000D_(12.09 to 33.925)	8.166	12.872	117 (119)
Sudan	0.54195	151.234_x000D_(119.065 to 193.365)	53.614	97.621	95 (91)	1612.749_x000D_(1366.266 to 1939.079)	525.403	1087.35	99 (96)	22.111_x000D_(13.564 to 34.486)	8.855	13.256	124 (129)
Suriname	0.633666	180.958_x000D_(132.568 to 247.154)	51.268	129.691	118 (115)	1814.168_x000D_(1534.863 to 2154.636)	525.45	1288.72	111 (108)	21.654_x000D_(13.445 to 35.451)	8.063	13.591	128 (126)
Sweden	0.88688	181.152_x000D_(124.902 to 260.734)	50.908	130.245	119 (116)	2054.505_x000D_(1677.362 to 2613.277)	525.21	1529.3	128 (127)	19.721_x000D_(10.053 to 37.316)	6.413	13.308	125 (104)
Switzerland	0.933059	224.502_x000D_(153.788 to 324.949)	50.834	173.667	149 (149)	2478.072_x000D_(1993.448 to 3220.553)	525.505	1952.57	155 (155)	24.408_x000D_(12.255 to 45.7)	6.402	18.005	154 (145)
Syrian Arab Republic	0.623004	244.815_x000D_(174.934 to 339.669)	51.837	192.979	158 (157)	8263.689_x000D_(4961.038 to 13243.409)	525.579	7738.11	204 (204)	133.092_x000D_(66.147 to 241.161)	8.114	124.978	204 (204)
Taiwan (Province of China)	0.874747	53.066_x000D_(40.882 to 70.275)	50.724	2.342	3 (2)	616.258_x000D_(538.662 to 734.392)	525.562	90.695	6 (3)	6.174_x000D_(3.299 to 10.917)	6.174	0	2 (1)
Tajikistan	0.541511	217.439_x000D_(156.482 to 299.137)	53.577	163.862	144 (144)	2059.791_x000D_(1716.889 to 2480.281)	525.052	1534.74	129 (128)	24.862_x000D_(15.285 to 40.201)	8.857	16.006	145 (149)
Thailand	0.682548	100.934_x000D_(77.286 to 131.296)	51.072	49.862	68 (53)	1010.266_x000D_(874.608 to 1200.083)	525.389	484.878	59 (34)	10.425_x000D_(5.968 to 18.137)	8.047	2.378	27 (17)
Timor-Leste	0.444668	104.862_x000D_(78.757 to 141.592)	61.991	42.871	56 (58)	768.368_x000D_(659.497 to 913.664)	657.828	110.54	8 (10)	10.407_x000D_(6.523 to 16.248)	10.383	0.024	4 (16)
Togo	0.408534	95.848_x000D_(74.817 to 122.829)	75.973	19.875	14 (40)	1099.231_x000D_(947.34 to 1284.159)	900.602	198.629	16 (52)	15.203_x000D_(9.497 to 23.604)	13.661	1.542	19 (60)
Tokelau	0.686426	68.124_x000D_(50.655 to 92.367)	51.155	16.969	8 (7)	684.03_x000D_(585.259 to 833.637)	525.413	158.616	11 (6)	8.789_x000D_(5.249 to 14.258)	7.991	0.798	8 (4)
Tonga	0.62635	61.876_x000D_(46.581 to 83.763)	51.075	10.801	6 (4)	705.252_x000D_(602.428 to 853.652)	525.496	179.757	13 (7)	9.215_x000D_(5.581 to 14.457)	8.036	1.179	13 (8)
Trinidad and Tobago	0.768763	217.865_x000D_(158.089 to 296.608)	50.947	166.918	145 (145)	2063.269_x000D_(1726.544 to 2461.12)	525.667	1537.6	130 (129)	24.106_x000D_(14.508 to 39.382)	8.22	15.886	144 (142)
Tunisia	0.682432	172.211_x000D_(130.1 to 226.546)	51.065	121.146	105 (103)	1665.088_x000D_(1411.359 to 1970.26)	525.436	1139.65	103 (100)	16.175_x000D_(8.797 to 28.268)	8.315	7.86	92 (71)
Turkey	0.712693	137.861_x000D_(102.965 to 184.453)	50.806	87.056	88 (82)	1425.373_x000D_(1207.564 to 1697.617)	525.07	900.303	93 (87)	14.143_x000D_(7.771 to 24.889)	8.116	6.026	72 (46)
Turkmenistan	0.682161	266.885_x000D_(194.139 to 369.072)	50.935	215.95	166 (166)	2467.29_x000D_(2065.751 to 2988.659)	525.503	1941.79	154 (154)	26.77_x000D_(16.042 to 44.992)	7.775	18.995	157 (154)
Tuvalu	0.576621	65.929_x000D_(50.298 to 86.566)	50.828	15.101	7 (6)	635.069_x000D_(546.437 to 767.579)	525.202	109.867	7 (4)	9.104_x000D_(5.641 to 14.152)	8.052	1.052	11 (7)
Uganda	0.423261	102.555_x000D_(80.408 to 132.189)	72.453	30.102	33 (55)	1125.711_x000D_(974.178 to 1314.123)	658.323	467.389	53 (58)	15.873_x000D_(10.113 to 24.652)	12.983	2.891	33 (70)
Ukraine	0.760774	331.679_x000D_(245.514 to 446.488)	50.706	280.973	184 (184)	2930.868_x000D_(2465.481 to 3517.013)	525.476	2405.39	171 (171)	29.298_x000D_(16.735 to 51.277)	8.036	21.262	169 (167)
United Arab Emirates	0.849318	144.77_x000D_(106.2 to 191.723)	50.592	94.178	91 (85)	1390.468_x000D_(1186.784 to 1674.047)	525.285	865.183	88 (79)	14.643_x000D_(8.366 to 25.157)	7.763	6.88	80 (51)
United Kingdom	0.859	157.528_x000D_(109.73 to 225.591)	50.738	106.79	100 (96)	1753.919_x000D_(1432.942 to 2223.572)	525.295	1228.62	109 (106)	16.883_x000D_(8.57 to 31.733)	7.131	9.752	100 (81)
United Republic of Tanzania	0.446568	106.195_x000D_(82.071 to 137.263)	61.973	44.222	58 (63)	1204.546_x000D_(1039.547 to 1405.448)	678.016	526.529	64 (65)	16.524_x000D_(10.411 to 25.688)	10.782	5.741	68 (75)
United States Virgin Islands	0.821831	195.036_x000D_(136.648 to 277.254)	50.682	144.355	135 (133)	2078.114_x000D_(1737.143 to 2510.597)	525.527	1552.59	134 (133)	20.712_x000D_(11.692 to 35.608)	7.819	12.893	119 (116)
United States of America	0.862448	98.533_x000D_(71.324 to 136.324)	51.667	46.867	61 (45)	987.44_x000D_(840.745 to 1172.282)	525.272	462.168	52 (28)	9.343_x000D_(4.741 to 17.026)	7.138	2.205	25 (9)
Uruguay	0.719283	307.335_x000D_(205.074 to 448.683)	51.563	255.771	177 (176)	2774.259_x000D_(2217.026 to 3456.401)	525.102	2249.16	164 (164)	25.687_x000D_(13.204 to 46.975)	8.249	17.438	152 (152)
Uzbekistan	0.662622	232.009_x000D_(168.108 to 316.591)	50.686	181.323	151 (151)	2201.156_x000D_(1845.668 to 2632.166)	525.277	1675.88	147 (147)	24.664_x000D_(14.405 to 40.314)	8.079	16.585	147 (147)
Vanuatu	0.473101	65.05_x000D_(50.019 to 84.386)	61.977	3.074	4 (5)	707.49_x000D_(609.985 to 852.421)	648.059	59.431	4 (8)	10.811_x000D_(6.951 to 16.421)	10.426	0.385	6 (19)
Venezuela (Bolivarian Republic of)	0.596513	351.082_x000D_(254.935 to 479.99)	50.901	300.181	186 (186)	3579.393_x000D_(2955.531 to 4314.955)	525.486	3053.91	185 (184)	37.768_x000D_(21.974 to 64.036)	8.042	29.726	184 (182)
Viet Nam	0.627934	109.976_x000D_(82.926 to 144.487)	50.772	59.204	77 (66)	1086.498_x000D_(936.361 to 1280.742)	525.474	561.023	68 (47)	11.593_x000D_(6.724 to 19.904)	7.915	3.678	42 (22)
Yemen	0.450376	642.243_x000D_(378.761 to 1044.312)	61.977	580.266	203 (203)	3980.593_x000D_(2783.89 to 5814.36)	656.331	3324.26	187 (188)	77.803_x000D_(43.846 to 131.644)	10.388	67.415	201 (201)
Zambia	0.505949	95.772_x000D_(73.442 to 124.1)	60.133	35.639	42 (38)	1039.673_x000D_(892.709 to 1226.077)	564.133	475.54	57 (40)	14.346_x000D_(9.076 to 22.529)	9.36	4.986	58 (47)
Zimbabwe	0.473819	89.255_x000D_(69.943 to 113.83)	61.974	27.281	28 (26)	944.25_x000D_(827.046 to 1085.876)	646.222	298.028	31 (22)	13.793_x000D_(8.714 to 20.824)	10.399	3.394	39 (43)
